# Supplementary material for: Dispersive and FT-Raman spectroscopic methods in food analysis
Source: Royal Society of Chemistry journal article supplement (doi:10.1039/c4ra12463d), 2015-01-01
Supplement: c4ra12463d1.pdf [file c4ra12463d1.pdf]

rev

## SUPPLEMENTARY DATA

### Title:

Dispersive and FT-Raman Spectroscopic Methods in Food Analysis

### Authors

Ismail Hakkı Boyacı<sup>1,2\*</sup>, Havva Tümay Temiz<sup>1</sup>, Hüseyin Efe Geniş<sup>1</sup>, Esra Acar Soykut<sup>2</sup>, Nazife Nur Yazgan<sup>1</sup>, Burcu Güven<sup>1</sup>, Reyhan Selin Uysal<sup>1</sup>, Akif Göktuğ Bozkurt<sup>1</sup>, Kerem İlaslan<sup>1</sup>, Ozlem Torun<sup>1</sup>, Fahriye Ceyda Dudak Şeker<sup>1</sup>

### Affiliation of the authors:

<sup>1</sup> Department of Food Engineering, Faculty of Engineering, Hacettepe University, Beytepe 06800 Ankara, Turkey

<sup>2</sup> Food Research Center, Hacettepe University, Beytepe 06800 Ankara, Turkey

### \*Corresponding author:

Prof. Dr. İsmail Hakkı Boyacı  
Hacettepe University  
Department of Food Engineering  
Beytepe, 06800 Ankara, TURKEY  
Phone: +90 312 297 61 46  
Fax: +90 312 299 21 23  
e-mail: [ihb@hacettepe.edu.tr](mailto:ihb@hacettepe.edu.tr)

**Table 1S. Raman spectra of some proteins**

| <b>Band position cm<sup>-1</sup></b> | <b>Assignment of Bonds (Molecule/Group)</b> | <b>Mode of Vibration</b> | <b>Strength of bonds</b> | <b>Sample / Food Matrix</b>                                                                                                                                                                                                                                                                                                                                                                                                                                                                                                         | <b>Wavenumber of laser source (nm)</b> | <b>Type of Raman</b> | <b>References</b> |
|--------------------------------------|---------------------------------------------|--------------------------|--------------------------|-------------------------------------------------------------------------------------------------------------------------------------------------------------------------------------------------------------------------------------------------------------------------------------------------------------------------------------------------------------------------------------------------------------------------------------------------------------------------------------------------------------------------------------|----------------------------------------|----------------------|-------------------|
| 1665                                 | C=O                                         | Stretching               | -                        | Jack bean concanavalin A (Con A), bovine pancreas                                                                                                                                                                                                                                                                                                                                                                                                                                                                                   | 206.5                                  | UV-Raman             | 1                 |
|                                      | C-N                                         | Stretching               | -                        |                                                                                                                                                                                                                                                                                                                                                                                                                                                                                                                                     |                                        |                      |                   |
|                                      | N-H                                         | Bending                  | -                        |                                                                                                                                                                                                                                                                                                                                                                                                                                                                                                                                     |                                        |                      |                   |
| 1610                                 | Amino acid ring                             | Breathing                | -                        | trypsin (trypsin), bovine serum albumin (BSA), bovine pancreas                                                                                                                                                                                                                                                                                                                                                                                                                                                                      | 206.5                                  | UV-Raman             | 1                 |
|                                      | Amide (II)                                  |                          | -                        |                                                                                                                                                                                                                                                                                                                                                                                                                                                                                                                                     |                                        |                      |                   |
| 1555                                 | C-N                                         | Stretching               | -                        | ribonuclease A (RNase A), horse heart cytochrome <i>c</i> (cyt <i>c</i> ), human hemoglobin (Hb), horse skeletal muscle myoglobin (Mb), bovine pancreas R-chymomyosin (Chy), porcine pancreas elastase (Elas), chicken egg white lysozyme (Lyso), human erythrocyte carbonic anhydrase (Carb), porcine muscle triosephosphate isomerase (Trio), bovine pancreas insulin (Ins), tyrosine (Tyr), phenylalanine (Phe), tryptophan (Trp), histidine (His), arginine (Arg), cysteine (Cys), proline (Pro), methionine (Met), cystine / - | 206.5                                  | UV-Raman             | 1                 |
|                                      | N-H                                         | Bending                  | -                        |                                                                                                                                                                                                                                                                                                                                                                                                                                                                                                                                     |                                        |                      |                   |
|                                      | C-C                                         | Stretching               | -                        |                                                                                                                                                                                                                                                                                                                                                                                                                                                                                                                                     |                                        |                      |                   |

|           |                                          |                                                 |   |                            |     |               |   |
|-----------|------------------------------------------|-------------------------------------------------|---|----------------------------|-----|---------------|---|
| 800-900   | C-C                                      | Stretching                                      | - |                            |     |               |   |
| 1000-1100 | C-C                                      | Stretching                                      | - |                            |     |               |   |
| 1302      | CH <sub>2</sub>                          | Phase twist                                     | - |                            |     |               |   |
| 1443      | CH <sub>2</sub>                          | Scissoring                                      | - |                            |     |               |   |
| 1660      | C=C                                      | Stretch (cis)                                   | - | Mineral oil and corn oil / | 782 | Raman         |   |
| 1750      | C=O                                      | Ester stretch                                   | - | Protein and oil interface  |     | microspectros | 2 |
| 2730      | CH <sub>2</sub> or CH <sub>3</sub>       | Deformation                                     | - |                            |     | copy          |   |
| 2850,2870 | CH <sub>2</sub> ,CH <sub>3</sub>         | Symmetric stretch                               | - |                            |     |               |   |
| 3010      | =CHR or =CH <sub>2</sub>                 | =CH stretch                                     | - |                            |     |               |   |
| 503       | S-S                                      | Stretching vibrations<br>(gauche-gauche-gauche) | - |                            |     |               |   |
| 750       | Tryptophan                               | -                                               | - |                            |     |               |   |
| 830,850   | Tyrosine doublet                         | -                                               | - |                            |     |               |   |
| 936-946   | Amide III helix                          | -                                               | - |                            |     |               |   |
| 965-970   | Amide III random                         | -                                               | - |                            |     |               |   |
| 980-990   | amide III<br>antiparallel $\beta$ -sheet | -                                               | - | Bovine Serum Albumin /     | 782 | Raman         |   |
| 1003      | Phenylalanine                            | -                                               | - | Protein and oil interface  |     | microspectros | 2 |
| 1338      | C-H                                      | Bending                                         | - |                            |     | copy          |   |
| 1448      | Tryptophan                               | -                                               | - |                            |     |               |   |
| 1654      | C-H                                      | Bending                                         | - |                            |     |               |   |
|           | Amide I band                             | -                                               | - |                            |     |               |   |

|               |                            |            |   |                                              |     |                          |   |
|---------------|----------------------------|------------|---|----------------------------------------------|-----|--------------------------|---|
| 2930          | C-H                        | Stretching | - | Various amino acids / BSA and oil interface  |     |                          |   |
| 3076          | =C-H                       | Stretching | - | Aromatic amino acids / BSA and oil interface | 782 | Raman microspectros copy | 2 |
| 3200          | O-H                        | Stretching | - | Water molecules / BSA and oil interface      |     |                          |   |
| 497,524       | Cysteine S-S               | -          | - |                                              |     |                          |   |
| 761           | Tryptophan                 | -          | - |                                              |     |                          |   |
| 831,852       | Tyrosine doublet           | -          | - |                                              |     |                          |   |
| 1337          | C-H / Tryptophan           | Bending    | - |                                              |     |                          |   |
| 1454          | CH <sub>2</sub>            | Bending    | - | Egg albumen(unheated) / -                    |     | FT-Raman                 | 3 |
| 1060          | C-N / C-C                  | Stretching | - |                                              |     |                          |   |
| 933, 947, 960 | Amide III'                 | -          | - |                                              |     |                          |   |
| 991           | B-sheet structure          | -          | - |                                              |     |                          |   |
| 1317          | A- helix structure         | -          | - |                                              |     |                          |   |
| 500, 511      | Cysteine S-S               | -          | - |                                              |     |                          |   |
| 758           | Tryptophan                 | -          | - |                                              |     |                          |   |
| 831,851       | Tyrosine doublet           | -          | - |                                              |     |                          |   |
| 1350          | CH                         | Bending    | - |                                              |     |                          |   |
|               | Tryptophan                 | -          | - |                                              |     |                          |   |
| 1418          | COO-                       | -          | - | Whey proteins (unheated) / -                 |     | FT-Raman                 | 3 |
| 1450          | CH <sub>2</sub>            | Bending    | - |                                              |     |                          |   |
| 1051          | C-N / C-C                  | Stretching | - |                                              |     |                          |   |
| 938, 951      | Amide III'                 | -          | - |                                              |     |                          |   |
| 986           | B-sheet structure          | -          | - |                                              |     |                          |   |
| 1239          | Amide III                  | -          | - |                                              |     |                          |   |
| 1321          | $\alpha$ - helix structure | -          | - |                                              |     |                          |   |

|                  |                                                                 |            |      |                                                                                                   |      |          |
|------------------|-----------------------------------------------------------------|------------|------|---------------------------------------------------------------------------------------------------|------|----------|
| 1650-1660        | Amide I                                                         | -          | -    |                                                                                                   |      |          |
| 1260-1300        | Amide III                                                       | Weak       | Weak |                                                                                                   |      |          |
| 850, 830         | Tyrosine doublet                                                | -          | -    |                                                                                                   |      |          |
| 2935 (2939-2950) | Native gluten                                                   | -          | -    |                                                                                                   |      |          |
| 500-550          | S-S vibrational bands                                           | -          | -    |                                                                                                   |      |          |
| (534)            | (trans-gauche-trans)rotamer                                     | -          | -    |                                                                                                   |      |          |
| (503)            | (gauche-gauche-gauche) form                                     | -          | -    |                                                                                                   |      |          |
| (533)            | (trans-gauche-trans)                                            | -          | -    |                                                                                                   |      |          |
| (514,497)        | (gauche-gauche-gauche)                                          | -          | -    | Gluten and chemically modified gluten / wheat flour or mix composed by flour and emulsifier (SSL) | 1064 | FT-Raman |
| 1361             | Indicator of buried tryptophan residues                         | -          | -    |                                                                                                   |      | 4        |
| (880,760)        | Strength of H bonding and the hydrophobicity of the environment | -          | -    |                                                                                                   |      |          |
| 508              | S-S                                                             | Stretching | -    |                                                                                                   |      |          |
| 540              | Tryptophan                                                      | -          | -    |                                                                                                   |      |          |
| 541-576          | Tryptophan                                                      | -          | -    |                                                                                                   |      |          |
| 759              | Tryptophan                                                      | -          | -    |                                                                                                   |      |          |

|                 |                                          |             |        |                                  |     |              |
|-----------------|------------------------------------------|-------------|--------|----------------------------------|-----|--------------|
| 761             | Tryptophan                               | -           | -      |                                  |     |              |
| 831,856         | Tyrosine Tyrosine                        | -           | -      |                                  |     |              |
| 832,858         | Tryptophan                               | -           | -      |                                  |     |              |
| 883             | Tryptophan                               | -           | -      |                                  |     |              |
| 886             | Amide III' ( $\alpha$ -                  | -           | -      |                                  |     |              |
| 941             | helix)                                   | -           | -      |                                  |     |              |
|                 | Amide III' ( $\alpha$ -                  | -           | -      |                                  |     |              |
| 947             | helix)                                   | -           | -      |                                  |     |              |
|                 | Amide III'                               | -           | -      |                                  |     |              |
| 960             | Amide III' ( $\beta$ -                   | -           | -      | $\alpha$ -lactalbumin, $\beta$ - | 488 | Raman        |
| 984             | sheet)                                   | -           | -      | lactoglobulin / -                |     | spectroscopy |
|                 | Phenylalanine                            |             |        |                                  |     |              |
| 1005            | Phenylalanine                            | -           | -      |                                  |     |              |
| 1007            | Tryptophan                               | Shoulder    | -      |                                  |     |              |
| 1014            | Phenylalanine                            | -           | -      |                                  |     |              |
| 1033,1034       | C-N                                      | Stretching  | -      |                                  |     |              |
| 1072,1130, 1162 |                                          | -           | -      |                                  |     |              |
| 1084,1130,      | C-N                                      | Stretching  | -      |                                  |     |              |
| 1161            |                                          | -           | -      |                                  |     |              |
| (1180) 1183     | Tyrosine                                 | -           | -      |                                  |     |              |
| (1207) 1211     | Tyrosine,                                | -           | -      |                                  |     |              |
|                 | phenylalanine                            | -           | -      |                                  |     |              |
| 1336, 1385      | Tryptophan                               | -           | -      |                                  |     |              |
| (1453) 1455     | CH <sub>2</sub>                          | Deformation | -      |                                  |     |              |
| 1556            | Tryptophan                               | -           | -      |                                  |     |              |
| (1658) 1651     | Amide I'                                 | -           | -      |                                  |     |              |
|                 |                                          | -           | -      |                                  |     |              |
| 1003            | Phenylal<br>anine (internal<br>standard) | -           | -      |                                  |     |              |
| 1780            | C=O (glutamate or<br>aspartate*)         | Stretching  |        |                                  |     |              |
| 1900-1550       | C=O (Carbonyl<br>groups)                 | Stretching  | Strong |                                  |     |              |

|                   |                                                         |            |              |                                                          |     |                         |   |
|-------------------|---------------------------------------------------------|------------|--------------|----------------------------------------------------------|-----|-------------------------|---|
| 1800-1740         | C=O (carboxylic acid monomers)                          | Stretching |              |                                                          |     |                         |   |
| 1732              | C=O ( $\alpha$ -carboxyl groups)                        |            | -            |                                                          |     |                         |   |
| 1667-1673         | Amide I band (predominantly $\beta$ -sheet)             |            | -            |                                                          |     |                         |   |
| 1230-1240         | Amide III band (predominantly $\beta$ -sheet)           | -          | More intense | Soy protein isolate, whey protein isolate, egg White / - | 514 | Raman microspectroscopy | 6 |
| 1650-1660         | Amide I band (high proportion of $\alpha$ -helix)       | -          | -            |                                                          |     |                         |   |
| 1260-1300         | Amide III band (high proportion of $\alpha$ -helix)     | -          | Weak         |                                                          |     |                         |   |
| 1665              | Amide I (high proportion of undefined or random coil)   | -          | -            |                                                          |     |                         |   |
| 1245              | Amide III (high proportion of undefined or random coil) | -          | -            |                                                          |     |                         |   |
| 2800-3000         | Amino acid functional groups                            | Stretching | -            |                                                          |     |                         |   |
| Near 1450         | Amino acid functional groups                            | Bending    | -            |                                                          |     |                         |   |
| $I_{850}/I_{830}$ | Participation of tyrosine phenolic groups               | -          | -            |                                                          |     |                         |   |
|                   | Tryptophan                                              | -          | -            |                                                          |     |                         |   |
| 757               |                                                         | -          | -            |                                                          |     |                         |   |

|                  |                                              |                                                                                     |  |  |            |                   |
|------------------|----------------------------------------------|-------------------------------------------------------------------------------------|--|--|------------|-------------------|
| 1003             | Phenylalanine                                | -                                                                                   |  |  |            |                   |
| 853              | Tyrosine                                     | -                                                                                   |  |  |            |                   |
| 757              | Tryptophan                                   | -                                                                                   |  |  |            |                   |
| 1254, 1299, 1340 | Amide III ( $\alpha$ -helix)                 | -                                                                                   |  |  |            |                   |
| 1393             | Amide S ( $C_{\alpha}H$ ) ( $\alpha$ -helix) | -                                                                                   |  |  |            |                   |
| 1525, 1552       | Amide II ( $\alpha$ -helix)                  | -                                                                                   |  |  |            |                   |
| 1649, 1685       | Amide I ( $\alpha$ -helix)                   | (Amide I bands,                                                                     |  |  |            |                   |
| 1241, 1300, 1363 | Amide III ( $\beta$ -sheet)                  | mainly C=O                                                                          |  |  |            |                   |
| 1399             | Amide S ( $\beta$ -sheet)                    | stretching and particularly sensitive to H-bond donation to the C-O groups)         |  |  |            |                   |
| 1537, 1562       | Amide II ( $\beta$ -sheet)                   |                                                                                     |  |  |            |                   |
| 1630, 1670       | Amide I ( $\beta$ -sheet)                    | -                                                                                   |  |  | 197, 206.5 | UVRR-spectroscopy |
| 1244, 1297, 1332 | Amide III ( $\beta$ -turn)                   | -                                                                                   |  |  |            |                   |
| 1374             | Amide S ( $\beta$ -turn)                     | (Amide II and III                                                                   |  |  |            |                   |
| 1542             | Amide II ( $\beta$ -turn)                    | bands, in and out of phase combinations of C-N stretching and N-H in plane bending) |  |  |            |                   |
| 1652             | Amide I ( $\beta$ -turn)                     |                                                                                     |  |  |            |                   |
| 1253, 1279, 1332 | Amide III (unordered)                        |                                                                                     |  |  |            |                   |
| 1386             | Amide S (unordered)                          | -                                                                                   |  |  |            |                   |
| 1552             | Amide II (unordered)                         | -                                                                                   |  |  |            |                   |
| 1664             | Amide I (unordered)                          | -                                                                                   |  |  |            |                   |
| 1658-1650        | $\alpha$ -helices                            | -                                                                                   |  |  |            |                   |
| 1680-1665        | $\beta$ -sheets                              | -                                                                                   |  |  |            |                   |
| 1665-1660        | Random coil                                  | -                                                                                   |  |  |            |                   |
| 1309, 1273       | $C_{\alpha}$ -C, C=O                         | Stretching, plane bending                                                           |  |  |            |                   |
| 2938             | CH <sub>2</sub> asymmetric,                  | Stretching                                                                          |  |  |            |                   |



|                                                   |                                                   |                                 |   |                    |       |                          |    |
|---------------------------------------------------|---------------------------------------------------|---------------------------------|---|--------------------|-------|--------------------------|----|
|                                                   | CH <sub>3</sub> symmetric<br>(aliphatic residues) |                                 |   | Fish Surimi & gels | 1064  | FT-Raman<br>Spectroscopy | 8  |
| 850, 830<br>(I <sub>850</sub> /I <sub>830</sub> ) | Tyrosine doublet                                  | -                               |   |                    |       |                          |    |
| 3220                                              | O-H symmetric                                     | Stretching                      |   |                    |       |                          |    |
| 3400                                              | O-H asymmetric                                    | Stretching                      |   |                    |       |                          |    |
| 2500                                              | O-D                                               | Stretching                      |   |                    |       |                          |    |
| 937                                               | v(C-CN)                                           | Stretching                      | - |                    |       |                          |    |
| 879                                               | v(C-CN)                                           | Stretching                      | - |                    |       |                          |    |
| 856                                               | v(C-CN)                                           | Stretching                      | - |                    |       |                          |    |
| 829                                               | γ(COO)                                            | Out of plane bending            | - | Meat               | 1064  | FT-Raman                 | 9  |
| 480                                               | -                                                 | Out of plane bending            | - |                    |       |                          |    |
| 1265                                              | γ(C-H),R-HC=CH-                                   | -                               | - |                    |       |                          |    |
| 815,1032                                          | R                                                 | Skeletal Vibration              | - |                    |       |                          |    |
| 974                                               | C-C                                               | Out of plane<br>deformation     | - | Meat               | 785   | Raman                    | 10 |
| 1213                                              | =C-H                                              | Anti-symmetric<br>stretching    | - |                    |       |                          |    |
| 1654                                              | C=O                                               | Amide I                         | - |                    |       |                          |    |
| 1517                                              | N-H, C-N                                          | In plane bending,<br>Stretching | - |                    |       |                          |    |
| 1153                                              | C-N                                               | Stretching                      | - |                    |       |                          |    |
| 965                                               | -                                                 | Amide III                       | - |                    |       |                          |    |
| 1450                                              | CH <sub>2</sub> ,CH <sub>3</sub> ,CH              | Bending                         | - | Meat               | 514.5 | Raman                    | 11 |
| 2930                                              | CH <sub>2</sub> ,CH <sub>3</sub> ,CH              | Bending                         | - |                    |       |                          |    |
| 2935                                              | C-H                                               | -                               | - |                    |       |                          |    |
| 3220                                              | O-H                                               | Stretching                      | - |                    |       |                          |    |
| 3400                                              | O-H                                               | Stretching                      | - |                    |       |                          |    |
| 1060-1080                                         | CCC                                               | Stretching                      | - |                    |       |                          |    |
| 1250-1270                                         | =C-H                                              | Symmetric Rock                  | - | Fish               | 785   | Raman                    | 12 |
| 1390-1440                                         | CH <sub>2</sub>                                   | Scissoring                      | - |                    |       |                          |    |

|           |                                                   |                     |   |        |      |          |    |
|-----------|---------------------------------------------------|---------------------|---|--------|------|----------|----|
| 1600-1660 | C=C                                               | Stretching          | - |        |      |          |    |
| 1700-1750 | C=O                                               | Stretching          | - |        |      |          |    |
| 870       | C-N                                               | Stretching          | - |        |      |          |    |
| 1122      | C-C                                               | Stretching          | - | Ovine  | 671  | Raman    | 13 |
| 930       | C-C                                               | Stretching          | - |        |      |          |    |
| 1655-1650 | -                                                 | Amide I             | - |        |      |          |    |
| 1340      | C-H                                               | Bending             | - |        |      |          |    |
| 940-934   | C-C                                               | Stretching          | - | Meat   | 785  | Raman    | 14 |
| 1668-1663 | -                                                 | Amide I             | - |        |      |          |    |
| 1243-1237 | -                                                 | Amide III           | - |        |      |          |    |
| 1658      | Amide I                                           | -                   | - |        |      |          |    |
| 1262      | Amide II                                          | -                   | - |        |      |          |    |
| 1447      | C-H                                               | Bending             | - |        |      |          |    |
| 1003      | C-OH                                              | -                   | - |        |      |          |    |
| 1043      | C-C-1-H                                           | Stretching, bending | - |        |      |          |    |
|           |                                                   | Stretching, bending | - |        |      |          |    |
| 941-944   | O-C-1-H                                           | Stretching, bending | - |        |      |          |    |
|           |                                                   | -                   | - |        |      |          |    |
| 848-868   | O-C-1-H                                           | -                   | - |        |      |          |    |
|           |                                                   | -                   | - |        |      |          |    |
| 1331-1339 | C-H                                               | -                   | - | Bread  | 785  | Raman    | 15 |
| 1455-1599 | CH <sub>2</sub>                                   | -                   | - |        |      |          |    |
| 1500-1200 | CH <sub>2</sub> -C-6-O-H, C-5-C-6-H, C-O-H, C-C-H | Stretching          | - |        |      |          |    |
|           |                                                   | Bending             | - |        |      |          |    |
|           |                                                   | Bending             | - |        |      |          |    |
| 1350      | CO                                                | Amide I             | - |        |      |          |    |
|           | COH                                               | -                   | - |        |      |          |    |
| 1460      | CH <sub>2</sub>                                   | -                   | - |        |      |          |    |
| 1455      | -                                                 | -                   | - |        |      |          |    |
| 1263-1255 | C-1-O-H, C-6-O-H                                  | -                   | - |        |      |          |    |
| 933       | C-C                                               | -                   | - |        |      |          |    |
| 450-550   | S-S                                               | Stretching          | - | Gluten | 1064 | FT-Raman | 16 |
| 2800-3100 | CH                                                | Stretching          | - |        |      |          |    |
| 2934-2945 | OH                                                | -                   | - |        |      |          |    |

|               |                              |                         |                                   |       |       |    |
|---------------|------------------------------|-------------------------|-----------------------------------|-------|-------|----|
| 1582          | Indole                       | Ring                    |                                   |       |       |    |
| 1360          | Indole                       | Ring                    |                                   |       |       |    |
| 1014          | Indole                       | Ring                    |                                   |       |       |    |
| 877           | CH <sub>2</sub>              | Rock/indole ring        |                                   |       |       |    |
| 757           | Indole                       | Ring                    |                                   |       |       |    |
| 1268          | Tyrosine                     | -                       |                                   |       |       |    |
| 1207          | Tyrosine or<br>Phenylalanine | -                       |                                   |       |       |    |
| 852           | CCH                          | Aromatic<br>Deformation | Protein, Salt and Water           | 632.8 | Raman | 17 |
| 850/830       | Tyrosine                     | Ring                    |                                   |       |       |    |
| 827           | CCH                          | Aliphatic deformation   |                                   |       |       |    |
|               |                              | -                       |                                   |       |       |    |
| 1605          | Phenylalanine                | Ring Breathe            |                                   |       |       |    |
| 1002          | Phenylalanine                | Stretching              |                                   |       |       |    |
| 622           | C-S                          |                         |                                   |       |       |    |
| 530           | S-S                          | -                       |                                   |       |       |    |
| 620           | Phe                          | -                       |                                   |       |       |    |
| 820           | Phe                          | -                       |                                   |       |       |    |
| 1005          | Phe                          | -                       |                                   |       |       |    |
| 1600          | -                            | Amide I                 |                                   |       |       |    |
| 450           | C-C                          | Stretching              |                                   |       |       |    |
| 930           | C-C                          | Stretching              |                                   |       |       |    |
| 1180          | Phe                          | -                       | Protein Extract and Winter<br>Rye | 785   | Raman | 18 |
| 1200          | Phe                          | -                       |                                   |       |       |    |
| 1580          | Trp                          | -                       |                                   |       |       |    |
| 1280          | -                            | Amide III               |                                   |       |       |    |
| 1550          | Trp                          | -                       |                                   |       |       |    |
| 1600          | -                            | Amide I                 |                                   |       |       |    |
| 760,1005,1350 | Trp, Phe                     | -                       |                                   |       |       |    |
| 2930          | C-H                          | Stretching              |                                   |       |       |    |
| 1600          | -                            | Amide I                 |                                   |       |       |    |
| 3080-3200     | OH                           | Stretching              |                                   |       |       |    |
| 460-510       | -                            | Stretching              |                                   |       |       |    |
| 1645-1690     | Amide I                      | -                       |                                   |       |       |    |

|           |            |                             |  |       |     |       |    |
|-----------|------------|-----------------------------|--|-------|-----|-------|----|
| 740-766   | Tryptophan | Ring Breathing<br>Vibration |  | Bread | 532 | Raman | 19 |
| 3300-3420 | OH         | Stretching                  |  |       |     |       |    |
| 1580-1640 | OH         | Bending                     |  |       |     |       |    |
| 2800-3050 | CH         | Stretching                  |  |       |     |       |    |

**Table 2S. Raman spectra of some carbohydrates**

| Band position cm <sup>-1</sup> | Assignment of Bonds (Molecule/Group) | Mode of Vibration          | Strength of bonds | Sample / Food Matrix                             | Wavenumber of laser source (nm) | Type of Raman | References |
|--------------------------------|--------------------------------------|----------------------------|-------------------|--------------------------------------------------|---------------------------------|---------------|------------|
| 2725                           | C-H                                  | Stretching vibration       | -                 | Methyl group of acetyl substituent/Starchacetate | 1064                            | FT-Raman      | 20         |
| 1743                           | C=O                                  | Stretching vibration       | -                 |                                                  |                                 |               |            |
| 1338                           | CH <sub>2</sub> OH                   | Deformation vibration      | -                 |                                                  |                                 |               |            |
| 866                            | COC                                  | Symmetric stretching       | -                 |                                                  |                                 |               |            |
| 480                            | -                                    | Skeletal mode              | -                 |                                                  |                                 |               |            |
| 2910                           | C-H                                  | Stretching vibration       | -                 | - / Starch-                                      | 1064                            | FT-Raman      | 21         |
| 1460                           | CH <sub>2</sub>                      | Twisting deformation       | -                 |                                                  |                                 |               |            |
|                                | C-H                                  | Bending                    | -                 |                                                  |                                 |               |            |
| 1403                           | C-H                                  | Deformation bending        | Shoulder          |                                                  |                                 |               |            |
| 1381                           | C-OH                                 | Deformation                | -                 |                                                  |                                 |               |            |
|                                | CH                                   | Deformation bending        | -                 |                                                  |                                 |               |            |
|                                | CH <sub>2</sub>                      | Scissor deformation        | -                 |                                                  |                                 |               |            |
| 1341                           | CH <sub>2</sub>                      | Twisting deformation       | -                 |                                                  |                                 |               |            |
|                                | C-OH                                 | Deformation bending        | -                 |                                                  |                                 |               |            |
| 1305                           | C-H                                  | Deformation                | -                 |                                                  |                                 |               |            |
| 1264                           | CH <sub>2</sub>                      | Deformation                | -                 |                                                  |                                 |               |            |
|                                | C-OH                                 | -                          | -                 |                                                  |                                 |               |            |
|                                | CH <sub>2</sub> OH                   | (sidechain)<br>relatedmode | -                 |                                                  |                                 |               |            |
| 1205                           | C-H                                  |                            | -                 |                                                  |                                 |               |            |
| 1155                           | C1-O-C4                              | Deformation                | Shoulder          |                                                  |                                 |               |            |
| 1127                           | C-OH                                 | Asymmetric                 | -                 |                                                  |                                 |               |            |

|                                 |                 |                                                                           |          |                                   |      |             |    |
|---------------------------------|-----------------|---------------------------------------------------------------------------|----------|-----------------------------------|------|-------------|----|
|                                 | C-OH            | stretching                                                                | -        |                                   |      |             |    |
|                                 | C-O             | Stretching vibration                                                      | -        |                                   |      |             |    |
| 1110                            | C-C             | Deformation                                                               | Shoulder |                                   |      |             |    |
|                                 | C-O             | Stretching vibration                                                      | Shoulder |                                   |      |             |    |
|                                 | C-H             | Related mode                                                              | Shoulder |                                   |      |             |    |
| 1084                            | C-OH            | Related mode                                                              | -        |                                   |      |             |    |
| 1053                            | C-OH            | Related mode                                                              | -        |                                   |      |             |    |
|                                 | C-OH            | Deformation bending                                                       | -        |                                   |      |             |    |
|                                 | C-C             | Stretching vibration                                                      | -        |                                   |      |             |    |
| 1003                            | CH <sub>2</sub> | Deformation                                                               | -        |                                   |      |             |    |
| 943                             | C1-O-C4         | Stretching vibration                                                      | -        |                                   |      |             |    |
| 910                             | C-OH            | Related mode                                                              | Shoulder |                                   |      |             |    |
|                                 | CH <sub>2</sub> | Stretching vibration                                                      | Shoulder |                                   |      |             |    |
|                                 | C1-H            | Deformation                                                               | Shoulder |                                   |      |             |    |
| 865                             | C1-O-C5         | Deformation                                                               | -        |                                   |      |             |    |
|                                 | CH <sub>2</sub> | Deformation                                                               | -        |                                   |      |             |    |
|                                 | C-H             | Stretching vibration                                                      | -        |                                   |      |             |    |
| 770                             | C-C             | Deformation                                                               | -        |                                   |      |             |    |
| 721                             | C-C             | Deformation                                                               | -        |                                   |      |             |    |
| 411, 443, 480,<br>530, 576, 618 | C-C-O           | Ring mode                                                                 | -        |                                   |      |             |    |
|                                 |                 | Ring mode                                                                 | -        |                                   |      |             |    |
|                                 |                 | Stretching vibration,<br>pyranose ring<br>skeletal modes<br>(deformation) | -        |                                   |      |             |    |
| 3046                            | O-H             | Stretching, vibration                                                     | -        | Maleinated starch                 |      |             |    |
| 2800-3000                       | C-H             | Stretches                                                                 | -        | Starch                            |      |             |    |
| 1657                            | -               | -                                                                         | -        | Amylose                           | 1064 | FT-Raman    | 22 |
| 1657                            | C=C             | Stretching vibration                                                      | -        | Maleinated starch                 |      |             |    |
| 1641                            | C=O             | Stretching vibration                                                      | -        | Maleinated starch                 |      |             |    |
| 810-975                         | C-C             | stretches                                                                 | -        | Starch                            |      |             |    |
| 1456                            | -               | -                                                                         | -        | glucose, fructose/<br>sport drink | 633  | Micro-Raman | 23 |
| 1375                            | -               | -                                                                         | -        | $\alpha$ -anomer of glucose       |      |             |    |
| 1332                            | -               | -                                                                         | -        | $\alpha$ -anomer of glucose       |      |             |    |

|      |                                                |                                     |                          |                                                |      |                  |    |
|------|------------------------------------------------|-------------------------------------|--------------------------|------------------------------------------------|------|------------------|----|
| 1264 | -                                              | -                                   | -                        | fructose                                       |      |                  |    |
| 1128 | -                                              | -                                   | -                        | $\beta$ -anomer of glucose                     |      |                  |    |
| 1065 | -                                              | -                                   | -                        | $\beta$ -anomer of glucose                     |      |                  |    |
| 918  | -                                              | -                                   | -                        | $\alpha$ -anomer of glucose                    |      |                  |    |
| 867  | -                                              | -                                   | -                        | fructose                                       |      |                  |    |
| 836  | -                                              | -                                   | -                        | $\alpha$ -anomer of glucose                    |      |                  |    |
| 789  | -                                              | -                                   | -                        | $\alpha$ -anomer of glucose                    |      |                  |    |
| 742  | -                                              | -                                   | -                        | other                                          |      |                  |    |
| 710  | -                                              | -                                   | -                        | sucrose                                        |      |                  |    |
| 634  | -                                              | -                                   | -                        | fructose                                       |      |                  |    |
| 975  | C-O-P                                          | Asymmetric stretching               | strong                   | Starch phosphate                               | 1024 | FT-Raman         | 24 |
| 3030 | CH <sub>3</sub>                                | Asymmetric stretching               | -                        | Cationicstarch / Cationic Quaternary Ammonium  |      |                  |    |
| 970  | (CH <sub>3</sub> ) <sub>3</sub> N <sup>+</sup> | Asymmetric stretching               | -                        | Starch                                         | 785  | Dispersive Raman | 25 |
| 761  | (CH <sub>3</sub> ) <sub>3</sub> N <sup>+</sup> | Symmetric stretching                |                          |                                                |      |                  |    |
| 1459 | CH <sub>2</sub>                                | Deformation                         | decreasing in intensity  |                                                |      |                  |    |
| 1127 | C-O                                            | Stretching                          | decreasing in intensity  |                                                |      |                  |    |
| 1127 | C-O-H                                          | Deformation                         | decreasing in intensity  | Retrogradated starch                           | -    | FT-IR Raman      | 26 |
| 856  | C-C                                            | Skeletal modes of $\alpha$ -glucose | decreasing in intensity  |                                                |      |                  |    |
| 480  | Glucose                                        | Vibration                           | disappearing of the band |                                                |      |                  |    |
| 1607 | C=O                                            | Stretching vibration                | -                        | Carboxymethylated non-starch polysaccharides - | 514  | Laser            | 27 |
| 415  | $\delta$ (C2-C1-O1), $\alpha$ -glucose         | Bending                             | -                        |                                                |      |                  |    |
| 437  | $\delta$ (C2-C1-O1) $\beta$ -glucose           | Bending                             | -                        | Glucose                                        |      |                  |    |

|           |                                            |                    |   |          |      |                  |
|-----------|--------------------------------------------|--------------------|---|----------|------|------------------|
| 523       | -                                          | Skeletal Vibration | - |          |      |                  |
| 838       | $\nu(\text{C-C})$                          | -                  | - |          | 785  | Dispersive Raman |
| 856       | $\delta(\text{C1-H1})$                     | -                  | - |          |      |                  |
| 820-950   | $\nu(\text{C-O})$                          | -                  | - |          |      |                  |
|           | $\nu(\text{C-C})$                          | -                  | - |          |      |                  |
|           | $\delta(\text{C-C-H})$                     | -                  | - |          |      |                  |
|           | $\delta(\text{C-C-O})$                     | -                  | - |          |      |                  |
| 1106      | $\delta(\text{C-O-C})$                     | Angle Bending      | - |          |      |                  |
| 314       | $\delta(\text{C-C-C})$                     | Ring Vibration     | - |          |      |                  |
| 353       | $\delta(\text{C-C-C})$                     | Ring Vibration     | - |          |      |                  |
| 631       | -                                          | Ring Deformation   | - |          |      |                  |
| 709       | Fructose                                   | Skeletal Vibration | - |          |      |                  |
| 800       | $\nu(\text{C-C})$                          | -                  | - | Fructose | 785  | Dispersive Raman |
| 870       | C-O-C                                      | -                  | - |          |      |                  |
| 1028      | $\nu(\text{C-O})$                          | -                  | - |          |      |                  |
| 1054      | $\nu(\text{C-O})$                          | -                  | - |          |      |                  |
| 1074      | C-O-C                                      | -                  | - |          |      |                  |
| 419       | $\delta(\text{C-C-O})$                     | Ring Vibration     | - |          |      |                  |
| 544       | $\alpha$ -glycosidic bond                  | -                  | - |          |      |                  |
| 744       | $\nu(\text{C-C})$                          | -                  | - | Sucrose  | 785  | Dispersive Raman |
| 800       | $\nu(\text{C-C})$                          | -                  | - |          |      |                  |
| 1127      | C-OH                                       | Deformation        | - |          |      |                  |
| 3200      | O-H, Water                                 | Stretching         | - |          |      |                  |
| 1640      | O-H, Water                                 | Stretching         | - |          |      |                  |
| 2878      | CH <sub>2</sub> -CH <sub>3</sub> , Ethanol | Stretching         | - |          |      |                  |
| 2929      | CH <sub>2</sub> -CH <sub>3</sub> , Ethanol | Stretching         | - |          |      |                  |
| 2972      | CH <sub>2</sub> -CH <sub>3</sub> , Ethanol | Stretching         | - |          |      |                  |
| 1454      | CH <sub>2</sub> -CH <sub>3</sub> , Ethanol | Stretching         | - |          |      |                  |
| 1096      | CH <sub>3</sub> , Ethanol                  | Rocking Vibration  | - | Wine     | 1064 | FT-Raman         |
| 1054      | C-O, Ethanol                               | Stretching         | - |          |      |                  |
| 883       | C-C, Ethanol                               | Stretching         | - |          |      |                  |
| 1462      | CH <sub>2</sub> Sugar                      | Bending            | - |          |      |                  |
| 1130      | C-C, C-O, Sugar                            | Bending            | - |          |      |                  |
| 1050-1080 | C-C, C-O, Sugar                            | Bending            | - |          |      |                  |

|      |                                |                    |   |                  |     |       |    |
|------|--------------------------------|--------------------|---|------------------|-----|-------|----|
| 1449 | CH <sub>2</sub>                | Bending            | - | Barley and Wheat | 532 | Raman | 29 |
| 1659 | C=O                            | Stretching         | - |                  |     |       |    |
| 1004 | -                              | Breathing          | - |                  |     |       |    |
| 1610 | -                              | Stretching         | - |                  |     |       |    |
| 1095 | COC                            | Stretching         | - |                  |     |       |    |
| 1120 | COC                            | Stretching         | - |                  |     |       |    |
| 480  | -                              | Skeletal Vibration | - |                  |     |       |    |
| 901  | -                              | Skeletal Vibration | - |                  |     |       |    |
| 1604 | -                              | Aromatic Ring      | - |                  |     |       |    |
| 1631 | C=C                            | Stretching         | - |                  |     |       |    |
| 3420 | OH                             | Stretching         | - |                  |     |       |    |
| 858  | P-OH                           | Stretching         | - |                  |     |       |    |
| 894  | P-OH                           | Stretching         | - |                  |     |       |    |
| 1358 | C-H                            | -                  | - | Hydroxypropyl    | -   | Raman | 30 |
| 1453 | C-H                            | -                  | - | methylcellulose  |     |       |    |
| 478  | C-O-C, $\delta$ (C-C-O)        | Skeletal Mode      | - | Cereal Starch    | 785 | Raman | 31 |
| 1150 | $\nu_a$ (C-O-C)                | Stretching         | - |                  |     |       |    |
| 944  | $\nu_s$ (C-O-C)                | Stretching         | - |                  |     |       |    |
| 1130 | $\nu$ (C-OH)                   | Stretching and In  | - |                  |     |       |    |
|      | $\nu$ (C-O)<br>$\delta$ (C-OH) | plane bending      | - |                  |     |       |    |
| 150  | -                              | -                  | - | Mannitol         | 785 | Raman | 32 |
| 250  | -                              | -                  | - |                  |     |       |    |
| 1030 | -                              | -                  | - |                  |     |       |    |
| 1130 | -                              | -                  | - |                  |     |       |    |



**Table 3S. Raman spectra of some lipids**

| <b>Band position cm<sup>-1</sup></b> | <b>Assignment of Bonds (Molecule/Group)</b> | <b>Mode of Vibration</b>        | <b>Strength of bonds</b>          | <b>Sample / Food Matrix</b>                              | <b>Wavenumber of laser source (nm)</b> | <b>Type of Raman</b> | <b>References</b> |
|--------------------------------------|---------------------------------------------|---------------------------------|-----------------------------------|----------------------------------------------------------|----------------------------------------|----------------------|-------------------|
| 3020                                 | =C-H                                        | Asymmetric stretching vibration | Medium-Strong                     | - / Animal fat                                           | 1064                                   | FT-Raman             | 33                |
| 3007                                 | =C-H                                        | Symmetric stretching vibration  | Medium                            |                                                          |                                        |                      |                   |
| 2943                                 | -CH <sub>2</sub>                            | Asymmetric stretching vibration | Medium                            |                                                          |                                        |                      |                   |
| 2870-2840                            | -CH <sub>2</sub>                            | Symmetric stretching vibration  | Strong –                          |                                                          |                                        |                      |                   |
| 1665-1630                            | C=C                                         | Stretching vibration            | very strong                       |                                                          |                                        |                      |                   |
| 1480-1440                            | CH <sub>2</sub>                             | Scissoring vibration            | Medium -                          |                                                          |                                        |                      |                   |
| 1296                                 | =CH <sub>2</sub>                            | Deformation in plane            | strong                            |                                                          |                                        |                      |                   |
| 1269                                 | =C-H                                        | Symmetric rocking               | Very weak<br>Shoulder<br>Shoulder |                                                          |                                        |                      |                   |
| 1670                                 | C=C                                         | Stretching vibration            | -                                 | <i>trans</i> -olefin / soybean oil<br><i>cis</i> -olefin | 1064                                   | FT-Raman             | 34                |
| 1658                                 | C=C                                         | Stretching vibration            | -                                 | <i>cis</i> -olefin                                       |                                        |                      |                   |
| 1266                                 | CH=CH                                       | Symmetric rock                  | -                                 |                                                          |                                        |                      |                   |
| 3015                                 | =C-H                                        | Stretching vibration            | -                                 | cis-olefinic group / Hake Lipid                          | 1064                                   | FT-Raman             | 35                |
| 2931                                 | CH <sub>2</sub>                             | Asymmetric stretching           | -                                 | methyl and methylene groups in aliphatic molecules       |                                        |                      |                   |
| 2898                                 | CH <sub>3</sub>                             | Symmetric stretching            | -                                 | methyl and methylene groups in aliphatic molecules       |                                        |                      |                   |
| 2852                                 | CH <sub>2</sub>                             | Symmetric stretching            | -                                 | methyl and methylene groups in aliphatic molecules       |                                        |                      |                   |

|           |                 |                       |        |                             |      |          |    |
|-----------|-----------------|-----------------------|--------|-----------------------------|------|----------|----|
| 1746      | C=O             |                       | Strong | esters                      |      |          |    |
| 1658      | C=C             | Stretching vibration  | Strong | -                           |      |          |    |
| 1440      | CH <sub>2</sub> | Stretching vibration  | -      | -                           |      |          |    |
| 1301      | CH <sub>2</sub> | Scissoring vibration  | -      | -                           |      |          |    |
| 1266      | =CH             | twisting motion       | -      | -                           |      |          |    |
| 1079      | CCC             | symmetric rock (cis)  | -      | -                           |      |          |    |
| 970       | CCC             | Asymmetric            | -      | -                           |      |          |    |
| 928       | CCC             | stretching            | -      | -                           |      |          |    |
| 868       | CCC             | Symmetric stretching  | -      | -                           |      |          |    |
|           |                 | Symmetric stretching  |        | -                           |      |          |    |
|           |                 | Symmetric stretching  |        | -                           |      |          |    |
| 3015      | =C-H            | Asymmetric stretching | -      |                             |      |          |    |
| 2970      | C-H             | Asymmetric stretching | -      |                             |      |          |    |
| 2940      | C-H             | Asymmetric stretching | -      |                             |      |          |    |
| 2900      | C-H             | Symmetric stretching  | -      |                             |      |          |    |
| 2860      | C-H             | Symmetric stretching  | -      |                             |      |          |    |
| 1750      | C=O             | Stretching vibration  | -      |                             |      |          |    |
| 1670      | C=C             | Stretching vibration  | -      | Edible oil                  | 1064 | FT-Raman |    |
| 1660      | C=C             | Stretching vibration  | -      |                             |      |          | 36 |
| 1445      | C-H             | Deformation           | -      |                             |      |          |    |
| 1310      | C-H             | Deformation           | -      |                             |      |          |    |
| 1275      | =C-H            | Deformation           | -      |                             |      |          |    |
| 1100-1000 | C-C             | Stretching vibration  | -      |                             |      |          |    |
| 900-800   | C-C             | Stretching vibration  | -      |                             |      |          |    |
| 1657      | C=C             | Stretching vibration  | Strong | Lipid / Fish Salmon         |      |          |    |
| 1440      | CH <sub>2</sub> | Scissoring vibration  | Strong | Carotenoids                 |      |          |    |
| 1301      | CH <sub>2</sub> | Phase twist           | Strong | Carotenoids                 |      |          |    |
| 1267      | =C-H            | Symmetric rock (cis)  | Strong | Collagen (phenylalanine)    | 785  | Raman    | 37 |
|           |                 |                       |        | Collagen (peptide backbone) |      |          |    |
| 1076      | CCC             | Stretching vibration  | Strong | Collagen (proline)          |      |          |    |
| 1064      | CCC             | Stretching vibration  | Strong |                             |      |          |    |

|         |                 |                      |        |                       |      |          |
|---------|-----------------|----------------------|--------|-----------------------|------|----------|
| 1159    | -               | -                    | Strong |                       |      |          |
| 1518    | -               | -                    | Strong |                       |      |          |
| 1004    | -               | -                    | Weak   |                       |      |          |
| 940     | C-C             | Stretching vibration | Weak   |                       |      |          |
| 857     | -               | -                    | Weak   |                       |      |          |
| 3060    | N-H             | vibration            | -      | Protein / Milk Powder |      |          |
| 2927    | C-H             | vibration            | -      | -                     |      |          |
| 2900    | C-H             | vibration            | -      | -                     |      |          |
| 2853    | C-H             | vibration            | -      | -                     |      |          |
| 1745    | C=O             | vibration            | -      | Fat                   |      |          |
| 1665    | Amide I         | -                    | -      | Protein               |      |          |
| 1654    | C=C             | Vibration            | -      | -                     |      |          |
| 1455    | CH <sub>2</sub> | Scissor deformation  | -      | -                     |      |          |
| 1303    | CH <sub>2</sub> | Twisting deformation | -      | -                     |      |          |
| 1262    | Amide III       | -                    | -      | Protein               |      |          |
| 1121    | C-C             | Vibration            | -      | -                     | 1024 | FT-Raman |
| 1082    | C-C             | Vibration            | -      | -                     |      |          |
| 1065    | C-C             | Vibration            | -      | -                     |      |          |
| 1005    | Phenylalanine   | Ring breathing       | -      | Protein               |      |          |
| 860-920 | C-C             | Vibration            | -      | -                     |      |          |
|         | C-O             | Vibration            | -      | -                     |      |          |
|         | CH <sub>3</sub> | Rocking              | -      | -                     |      |          |
|         | Phenylalanine   | Ring breathing       | -      | -                     |      |          |
| 445     |                 | -                    | -      | Lactose               |      |          |
| 355     |                 | -                    | -      |                       |      |          |

|      |                                                                 |   |   |                     |     |                  |
|------|-----------------------------------------------------------------|---|---|---------------------|-----|------------------|
| 1618 | v (C=C)                                                         | - | - | Pulegone            |     |                  |
| 1457 | -                                                               | - | - | Pulegone            |     |                  |
| 1379 | -                                                               | - | - | Pulegone            |     |                  |
| 1339 | -                                                               | - | - | Pulegone            |     |                  |
| 647  | $\delta$ (ring)                                                 | - | - | Pulegone            |     |                  |
| 1460 | -                                                               | - | - | Thymol              |     |                  |
| 1380 | -                                                               | - | - | Thymol              |     |                  |
| 1261 | -                                                               | - | - | Thymol              |     |                  |
| 1065 | -                                                               | - | - | Thymol              |     |                  |
| 875  | -                                                               | - | - | Thymol              |     |                  |
| 740  | $\delta$ (ring)                                                 | - | - | Thymol              |     |                  |
| 1701 | v(nonconjugated C=C)                                            | - | - | $\gamma$ -Terpinene |     |                  |
| 1428 | Methyl and isopropyl C-H bending appears as a double broad band | - | - | $\gamma$ -Terpinene | 785 | Dispersive Raman |
| 756  | $\delta$ (ring)                                                 | - | - | $\gamma$ -Terpinene |     |                  |
| 1611 | v (ring)                                                        | - | - | <i>p</i> -Cymene    |     |                  |
| 1209 | $\delta$ (ring)                                                 | - | - | <i>p</i> -Cymene    |     |                  |
| 804  | $\delta$ (ring)                                                 | - | - | <i>p</i> -Cymene    |     |                  |
| 1460 | -                                                               | - | - | Carvacrol           |     |                  |
| 1261 | -                                                               | - | - | Carvacrol           |     |                  |
| 1065 | -                                                               | - | - | Carvacrol           |     |                  |
| 870  | -                                                               | - | - | Carvacrol           |     |                  |
| 760  | $\delta$ (ring)                                                 | - | - | Carvacrol           |     |                  |
| 718  | C=C-H out of plane                                              | - | - | linoleic acid       |     |                  |
| 724  |                                                                 | - | - | linoleic acid       |     |                  |
| 840  | vs(C-C)                                                         | - | - | linoleic acid       |     |                  |
| 908  | v(C-C)                                                          | - | - | linoleic acid       |     |                  |

|      |                            |                       |        |                         |       |       |    |
|------|----------------------------|-----------------------|--------|-------------------------|-------|-------|----|
| 949  | v(C-C), C $\alpha$ -atom   | -                     | -      | linoleic acid           |       |       |    |
| 980  | -                          | -                     | -      | linoleic acid           |       |       |    |
| 1064 | -                          | -                     | -      | linoleic acid           |       |       |    |
| 1078 | vas(C-C)trans              | -                     | -      | linoleic acid           | 514.5 | Raman | 40 |
| 1440 | v(C-C)                     | -                     | -      | linoleic acid           |       |       |    |
| 2885 | CH <sub>2</sub> scissoring | -                     | strong | linoleic acid           |       |       |    |
| 3011 | vs(CH <sub>2</sub> )       | -                     | -      |                         |       |       |    |
|      | v(=C-H)                    |                       |        |                         |       |       |    |
| 1265 | $\delta$ (C-H)             | -                     |        |                         |       |       |    |
| 1300 | C-H                        | Bending               |        |                         |       |       |    |
| 1440 | $\delta$ (C-H)             | Scissoring            |        |                         |       |       |    |
| 1650 | v(C=C)                     | -                     |        |                         |       |       |    |
| 1747 | v(C=O)                     | -                     |        |                         |       |       |    |
| 1008 | C-CH <sub>3</sub>          | -                     |        | Carotenoid in olive oil | 514.5 | Raman | 41 |
| 1150 | C-C                        | Stretching            |        |                         |       |       |    |
| 1525 | C=C                        | Stretching            |        |                         |       |       |    |
| 2850 | v(C-H)                     | Symmetric Stretching  |        |                         |       |       |    |
| 2950 | v(C-H)                     | Asymmetric Stretching |        |                         |       |       |    |
| 3015 | =C-H                       | Symmetric Scissoring  |        |                         |       |       |    |

**Table 4S. Raman spectra of some vitamins**

| Band position cm <sup>-1</sup> | Assignment of Bonds (Molecule/Group) | Mode of Vibration      | Strength of bonds | Sample / Food Matrix      | Wavenumber of laser source (nm) | Type of Raman | References |
|--------------------------------|--------------------------------------|------------------------|-------------------|---------------------------|---------------------------------|---------------|------------|
| 811                            | C-H bend                             | Ring breathing         | -                 | Vitamin B <sub>3</sub> /- |                                 |               |            |
| 811                            | C=C-C bend                           | Ring-related vibration | -                 | Vitamin B <sub>3</sub> /- |                                 |               |            |
| 1044                           | C-C-C bend                           | Trigonal               | -                 | Nicotinic acid/-          | 1064                            | FT-Raman      | 42         |
| 3087                           | C-H stretch                          | -                      | -                 | VitaminB <sub>3</sub> /-  |                                 |               |            |
| 2932                           | C-Hstretch                           | -                      | -                 | VitaminB <sub>6</sub> /-  |                                 |               |            |

|                                                             |                                                                                                                                                             |                                                 |                                                                          |                                                    |      |                             |    |
|-------------------------------------------------------------|-------------------------------------------------------------------------------------------------------------------------------------------------------------|-------------------------------------------------|--------------------------------------------------------------------------|----------------------------------------------------|------|-----------------------------|----|
| 1507                                                        | Cyanocobalamin bands                                                                                                                                        | Ring vibration                                  | strong                                                                   | VitaminB <sub>12</sub> /-                          | 360  | Resonance raman             | 43 |
| 1582/1593<br>2845/2865                                      | Aromatic part CHstretch,(CH, polymethylene chain)                                                                                                           | chromanol ring<br>-                             | -<br>-                                                                   | alfa-tocopherol/-<br>Vitamin E/-                   | 633  | Raman                       | 44 |
| 1635/1655                                                   | C=C,C=O bend                                                                                                                                                | Vibrational mode of quinone group               | strong                                                                   | Vitamin E/-                                        |      |                             |    |
| 3000<br>1580/1590                                           | C-H stretch<br>Terminal group                                                                                                                               | -<br>-                                          | -<br>-                                                                   | Vitamin A/-<br>retinol,retinal,<br>retinoic acid/- | -    | Laser-excited raman spectra | 45 |
| 1113<br>1758<br>1193<br>1661<br>1323<br>1258<br>1484<br>984 | C-O-C stretching<br>C=O stretch<br>C-C(=O)-O stretching<br>C=C stretch<br>CH bending (wagging)<br>C-O-H bending (twisting)<br>CH bending<br>C-H,O-H bending | -<br>Lactone ring<br>-<br>-<br>-<br>-<br>-<br>- | strong<br>weak<br>weak<br>strong<br>strong<br>strong<br>medium<br>strong | Vitamin C/-                                        | -    | FT-Raman                    | 46 |
| 3380<br>2916<br>1751<br>1659<br>1457<br>1257<br>1126        | O-H stretching<br>C-H stretching<br>C=O stretching<br>C=C<br>C-H bending<br>C-H bending(wisting)<br>C-O-C stretching                                        | -<br>-<br>-<br>Ring stretching<br>-<br>-<br>-   | weak<br>strong<br>weak<br>weak<br>medium<br>medium<br>medium             | Vitamin C/-                                        | 1064 | FT-Raman                    | 47 |

|             |                                                                                    |                            |        |              |     |                                      |    |
|-------------|------------------------------------------------------------------------------------|----------------------------|--------|--------------|-----|--------------------------------------|----|
| 1034        | C-O-Hbending                                                                       | -                          | weak   |              |     |                                      |    |
| 934/871/825 | C-C                                                                                | Ring stretching            | medium |              |     |                                      |    |
| 710/633     | C-C                                                                                | Ring stretching            | Medium |              |     |                                      |    |
| 1654        | C <sub>4</sub> =O uracil                                                           | NH <sub>3</sub> bending    | -      |              |     |                                      |    |
| 1259        | C <sub>2</sub> -N <sub>3</sub> -C <sub>4</sub><br>stretc+N <sub>3</sub> -H<br>bend | vibrational<br>vibrational | -      | Riboflavin/- | 266 | Red-<br>excited<br>raman<br>spectrum | 48 |

**Table 5S. Raman spectra of microorganisms and viruses**

| Band position, cm <sup>-1</sup> | Assignment of Bonds (Molecule/Group)          | Mode of Vibration | Strength of bonds | Sample/Food Matrix              | Wavenumber of laser source (nm) | Type of Raman | References |
|---------------------------------|-----------------------------------------------|-------------------|-------------------|---------------------------------|---------------------------------|---------------|------------|
| ~722                            | CH <sub>2</sub>                               | Rocking           |                   |                                 |                                 |               |            |
| 746                             |                                               | -                 |                   |                                 |                                 |               |            |
| ~778                            | Cytosine, urasil ring stretching              | -                 |                   |                                 |                                 |               |            |
| 850                             | CC ring breathing                             | Stretching        |                   |                                 |                                 |               |            |
|                                 | COC 1,4 Glycosidic link                       |                   |                   |                                 |                                 |               |            |
| 1001                            | CC aromatic ring breathing (phenylalanine)    | Stretching        |                   |                                 |                                 |               |            |
| 1125                            | COC symmetric glycosidic link (C-N) and (C-C) | Stretching        |                   | <i>Staphylococcus</i> strains/- | 532                             | Micro-Raman   | 49         |
| 1200-1280                       | Amide III                                     | -                 |                   |                                 |                                 |               |            |
| ~1327                           | C-H                                           | Deformation       |                   |                                 |                                 |               |            |
| 1440-1460                       | CH <sub>2</sub> scissoring                    | Deformation       |                   |                                 |                                 |               |            |
| 1575                            | Amide II                                      | -                 |                   |                                 |                                 |               |            |
|                                 | Guanine, adenine ring stretching              |                   |                   |                                 |                                 |               |            |
| 1650-1680                       | Amide I                                       | -                 |                   |                                 |                                 |               |            |
| 2935                            | CH <sub>2</sub> assymetric                    | Stretching        |                   |                                 |                                 |               |            |
| 3060                            | CH olefinic                                   | Stretching        |                   |                                 |                                 |               |            |
| 856                             | C-C stretching                                | -                 |                   |                                 |                                 |               |            |
| 1088                            | C-C                                           | Stretching        |                   | Bacteria, yeast and mold/-      | 1064                            | FT-Raman      | 50         |
| 1304                            | C-H stretching                                | bending           |                   |                                 |                                 |               |            |
| 1458                            | C-H stretching                                | bending           |                   |                                 |                                 |               |            |

|            |                                       |                                    |  |      |                   |    |
|------------|---------------------------------------|------------------------------------|--|------|-------------------|----|
| 1658       | C=C stretching                        | Stretching                         |  |      |                   |    |
| 2931       | C-H                                   | Stretching                         |  |      |                   |    |
| 3379       | O-H                                   | Stretching                         |  |      |                   |    |
| 1528       | C=C                                   | Stretching                         |  |      |                   |    |
| 1508       | C=C                                   | Stretching                         |  |      |                   |    |
| 1156       | C-C                                   | Stretching                         |  |      |                   |    |
| 1151       | C-C                                   | Stretching                         |  |      |                   |    |
| 1003       | C-C of the<br>C-CH <sub>3</sub> group | Stretching                         |  |      |                   |    |
| 1001       | C-C of the<br>C-CH <sub>3</sub> group | Stretching                         |  |      |                   |    |
| 1660       | Amide I                               | -                                  |  |      |                   |    |
| 1445       | CH <sub>2</sub> scissor mode          | -                                  |  |      |                   |    |
| 1002       | Aromatic ring breathing mode          | -                                  |  |      |                   |    |
| 1449       | CH <sub>2</sub>                       | Deformation                        |  |      |                   |    |
| 3059       | C=C-H aromatic                        | Stretching                         |  |      |                   |    |
| 2975       | CH <sub>3</sub>                       | Stretching                         |  |      |                   |    |
| 2935       | C-H                                   | Stretching                         |  |      |                   |    |
| 2870-2890  | CH <sub>2</sub>                       | Stretching                         |  |      |                   |    |
| 1735       | >C=O ester                            | Stretching                         |  |      |                   |    |
| 1650-1680  | Amide I                               | -                                  |  |      |                   |    |
| 1614       | Tyrosine                              | -                                  |  |      |                   |    |
| 1605-1606  | Phenylalanine                         | -                                  |  |      |                   |    |
| 1582, 1593 | Protein                               | -                                  |  |      |                   |    |
| 1575-1578  | Guanine, adenine                      | ring stretching                    |  |      |                   |    |
| 1440-1460  | C-H <sub>2</sub>                      | deformation                        |  |      |                   |    |
| 1129       | C-C, C-N                              | stretching                         |  |      |                   |    |
| 1102       | > PO <sub>2</sub> <sup>-</sup>        | Symetric<br>stretching             |  |      |                   |    |
| 1098       | CC skeletal, and COC                  | stretching from<br>glycosidic link |  |      |                   |    |
|            |                                       |                                    |  | 633  | Confocal<br>Raman | 51 |
|            |                                       |                                    |  | 1064 | FT-Raman          | 52 |



|           |                                                  |                                   |                              |     |                    |        |
|-----------|--------------------------------------------------|-----------------------------------|------------------------------|-----|--------------------|--------|
| 1085      | C–O                                              | stretching                        |                              |     |                    |        |
| 1061      | C–N and C–C                                      | Stretching                        |                              |     |                    |        |
| 1004      | Phenylalanine                                    | -                                 |                              |     |                    |        |
| 897       | COC                                              | stretching                        |                              |     |                    |        |
| 858       | CC str, COC 1,4 glycosidic link                  | -                                 |                              |     |                    |        |
| 852       | Buried tyrosine                                  | -                                 |                              |     |                    |        |
| 829       | Exposed tyrosine                                 | -                                 |                              |     |                    |        |
| 785       | Cytosine, uracil                                 | ring, stretching                  |                              |     |                    |        |
| 720       | Adenine                                          | -                                 |                              |     |                    |        |
| 665       | Guanine                                          | -                                 |                              |     |                    |        |
| 640       | Tyrosine (skeletal)                              | -                                 |                              |     |                    |        |
| 620       | Phenylalanine (skeletal)                         | -                                 |                              |     |                    |        |
| 540       | COC                                              | glycosidic ring deformation       |                              |     |                    |        |
| 520–540   | S–S                                              | stretching                        |                              |     |                    |        |
| 1172      | Tyrosine                                         | -                                 |                              |     |                    |        |
| 1247      | Guanine, adenine, urasil                         | -                                 |                              |     |                    |        |
| 1324      | Guanine, adenine, tyrosine                       | -                                 |                              |     |                    |        |
| 1359      | Thymine, adenine                                 | -                                 |                              |     |                    |        |
| 1475      | Guanine, adenine                                 | -                                 | <i>Bacillus</i> species/-    | 244 | UV-Resonance Raman | 53     |
| 1524      | Cytosine                                         | -                                 |                              |     |                    |        |
| 1567      | Guanine, adenine                                 | -                                 |                              |     |                    |        |
| 1607      | Tyrosine, tryptophan                             | -                                 |                              |     |                    |        |
| 1638      | Thymine                                          | -                                 |                              |     |                    |        |
| 1573      | C=C, N–H, and C–N str (amide II)                 | N–H deformation<br>C–N stretching |                              |     |                    |        |
| 1482–1487 | Nucleic acids                                    | -                                 |                              |     |                    |        |
| ~1320     | Amide III, C–H                                   | deformation                       |                              |     |                    |        |
| 1220–1290 | Amide III random, lipids                         | -                                 |                              |     |                    |        |
| 1030-1130 | Carbohydrates, –C–C– (skeletal), C–O, def(C–O–H) | C–O–H deformation                 | <i>Clostridium</i> species/- | 633 | Confocal Raman     | 54, 55 |
| ~1130     | =C–C= (unsaturated fatty acids in lipids)        | -                                 |                              |     |                    |        |
| 810–820   | Nucleic acids (C–O–P–O–C in RNA backbone)        | -                                 |                              |     |                    |        |
| 550       | Range glass background                           | -                                 |                              |     |                    |        |

|      |                                           |                                  |                   |     |     |    |
|------|-------------------------------------------|----------------------------------|-------------------|-----|-----|----|
| 481  | Skeletal modes of carbohydrates (starch)  | -                                |                   |     |     |    |
| 407  | Skeletal modes of carbohydrates (glucose) | -                                |                   |     |     |    |
| 757  | Tryptophan                                | W18                              |                   |     |     |    |
| 785  | Thymine, cytosine                         | Ring stretching                  |                   |     |     |    |
| 853  | Tyrosine                                  | Ring stretching                  |                   |     |     |    |
| 876  | Tryptophan                                | W17, N1H deformation             |                   |     |     |    |
| 1010 | Tryptophan                                | W16, CC                          |                   |     |     |    |
| 1178 | Tyrosine                                  | Y9a                              |                   |     |     |    |
| 1205 | Tyrosine                                  | Y7a                              |                   |     |     |    |
| 1239 | Tryptophan                                | W10                              |                   |     |     |    |
| 1243 | Thymine                                   | C2N3 stretching                  |                   |     |     |    |
| 1307 | Adenine                                   | C8H deformation                  |                   |     |     |    |
| 1335 | Adenine                                   | N7C5 stretching, C8N7 stretching |                   |     |     |    |
| 1372 | Adenine, Guanine, Thymine                 | C1N9 stretching, C6N6 stretching |                   |     |     |    |
| 1420 | Adenine                                   | C4C9 stretching, C8H deformation | <i>fd</i> virus/- | 257 | UVR | 56 |
| 1483 | Adenine                                   | C2H deformation, N9C8 stretching |                   |     |     |    |
| 1507 | Adenine                                   | N7C8 stretching                  |                   |     |     |    |
| 1530 | Cytosine, Guanine                         | N3C4 stretching                  |                   |     |     |    |
| 1560 | Tryptophan                                | W3, C2C3 stretching              |                   |     |     |    |
| 1575 | Guanine, Adenine, Tryptophan              | C5C4, C4N3 stretching, W2        |                   |     |     |    |
| 1616 | Tryptophan, Tyrosine                      | W1, Y8a                          |                   |     |     |    |
| 1646 | Thymine, Cytosine                         | C4=O, C5=C6 stretching           |                   |     |     |    |
| 1660 | Amide I Protein                           | -                                |                   |     |     |    |
| 1572 | Guanin/adenin                             | Ring Stretching                  |                   |     |     |    |

|           |                                              |                                      |                                          |       |       |    |
|-----------|----------------------------------------------|--------------------------------------|------------------------------------------|-------|-------|----|
| 1448      | CH <sub>2</sub>                              | Deformation                          |                                          |       |       |    |
| 1240      | C-C and C-N                                  |                                      |                                          |       |       |    |
|           | Adenin/Timin                                 |                                      |                                          |       |       |    |
|           | Amide I                                      | -                                    | Natural Mineral Water                    | Raman |       | 57 |
| 1003      | -                                            | Ring Breathing mode of phenylalanine |                                          |       |       |    |
| 780       | O-P-O                                        | -                                    |                                          |       |       |    |
| 720       | Adenin                                       | -                                    |                                          |       |       |    |
| 2975      | CH <sub>3</sub> str                          | -                                    | Protein, carbohydrate, lipids, cell wall |       |       |    |
| 2931      | CH <sub>3</sub> and CH <sub>2</sub> str      | -                                    | Protein, carbohydrate, lipids, cell wall |       |       |    |
| 2870-2890 | CH <sub>2</sub> str                          | -                                    | Protein, carbohydrate, lipids, cell wall |       |       |    |
| 1735      | -C=O str                                     | -                                    | PHB                                      |       |       |    |
| 1669      | Amide I                                      | -                                    | Protein                                  |       |       |    |
| 1614      | Tyr, Phe,                                    | -                                    | Protein                                  |       |       |    |
| 1605      | Phenylalanine (ring str),                    | -                                    | Protein                                  |       |       |    |
| 1575      | Guanine, adenine (ring str)                  | -                                    | DNA / RNA                                |       |       |    |
| 1450      | CH <sub>2</sub> def scissoring               | -                                    | Protein, carbohydrate, lipids, cell wall |       |       |    |
| 1360      | Tryptophan (indole ring str)                 | -                                    | Protein                                  | 532   | Raman | 58 |
| 1332      | Cytosine, uracil (ring str)                  | -                                    | DNA / RNA                                |       |       |    |
| 1314      | CH <sub>2</sub> def                          | -                                    | Protein                                  |       |       |    |
| 1236      | Amide III                                    | -                                    | Protein                                  |       |       |    |
| 1208      | T,C,A,Tyr, Phe                               | -                                    | Protein                                  |       |       |    |
| 1175      | T, G                                         | -                                    | DNA / RNA                                |       |       |    |
| 1124      | C-N str, C-C str skeletal trans              | -                                    | Protein, carbohydrate, lipids, cell wall |       |       |    |
|           | Conformation                                 | -                                    |                                          |       |       |    |
| 1098      | >PO <sub>2</sub> str (sym)                   | -                                    | Nucleic acids and Cell wall              |       |       |    |
|           | CC skeletal and COC str from glycosidic link | -                                    |                                          |       |       |    |
| 1030      | Phenylalanine, CC skeletal cis conformation  | -                                    | Protein and Cell wall                    |       |       |    |
|           |                                              | -                                    |                                          |       |       |    |

|      |                                    |                |                                             |     |             |    |
|------|------------------------------------|----------------|---------------------------------------------|-----|-------------|----|
| 1006 | Phenylalanine, Tryptophan          | -              | Protein                                     |     |             |    |
| 950  | Polysaccharide, DNA backbone       | -              | Polysaccharide, DNA                         |     |             |    |
| 852  | “buried” tyrosine                  | -              | Protein                                     |     |             |    |
| 826  | “exposed” tyrosine                 | -              | Protein                                     |     |             |    |
| 778  | Cytosine, uracil (ring stretching) | -              | DNA / RNA                                   |     |             |    |
| 745  | Adenine, thymine                   | -              | DNA / RNA                                   |     |             |    |
| 723  | Adenine                            | -              | DNA / RNA                                   |     |             |    |
| 695  | Guanine                            | -              | DNA / RNA                                   |     |             |    |
| 665  | Thymine, guanine                   | -              | DNA / RNA                                   |     |             |    |
| 640  | Tyrosine (skeletal)                | -              | Protein                                     |     |             |    |
| 620  | Phenylalanine (skeletal)           | -              | Protein                                     |     |             |    |
| 560  | COC glycosidic ring def            | -              | Protein, carbohydrate, lipids,<br>cell wall |     |             |    |
| 540  | S-S str - disulfide conformation   | -              | Protein                                     |     |             |    |
| 1656 | -                                  | Stretching     |                                             |     |             |    |
| 1437 | CH <sub>2</sub>                    | Deformation    |                                             |     |             |    |
| 1300 | CH <sub>2</sub>                    | Torsion        | Oil                                         | 532 | Micro Raman | 59 |
| 1262 | =CH                                | Deformation    |                                             |     |             |    |
| 1742 | C=O                                | Stretching     |                                             |     |             |    |
| 2900 | C-H                                | Stretching     | -                                           |     |             |    |
| 1650 | -                                  | Amide I        | -                                           |     |             |    |
| 1420 | CH <sub>2</sub>                    | Deformation    | -                                           |     |             |    |
| 1007 | -                                  | Ring Breathing | -                                           |     |             |    |
| 1385 | C-O-C                              | Stretching     | -                                           | -   | Micro Raman | 60 |
| 1440 | -                                  | Ring           | -                                           |     |             |    |
| 1565 | -                                  | Ring           | -                                           |     |             |    |
| 1532 | C=C                                | -              | -                                           |     |             |    |
| 1157 | C-C                                | -              | -                                           |     |             |    |
| 1005 | C-CH <sub>3</sub>                  | Deformation    | -                                           |     |             |    |
| 2933 | CH <sub>2</sub> , CH               | -              | -                                           |     |             |    |
| 1659 | -                                  | Amide I        | -                                           |     |             |    |
| 1578 | -                                  | -              | -                                           |     |             |    |
| 1447 | C-H                                | -              | -                                           |     |             |    |

|           |         |           |   |        |       |    |
|-----------|---------|-----------|---|--------|-------|----|
| 1317,1243 | -       | Amide III | - | 532.11 | Raman | 61 |
| 1094      | -       | -         | - |        |       |    |
| 1003      | Phe     | -         | - |        |       |    |
| 785       | DNA-RNA | -         | - |        |       |    |

**Table 6S. Raman spectra of toxins and chemicals**

| Band position cm <sup>-1</sup> | Assignment of Bonds (Molecule/Group) | Mode of Vibration                           | Strength of bonds | Sample / Food Matrix                                                                                      | Wavenumber of laser source (nm) | Type of Raman    | References |
|--------------------------------|--------------------------------------|---------------------------------------------|-------------------|-----------------------------------------------------------------------------------------------------------|---------------------------------|------------------|------------|
| 1450                           | C-H                                  | Bending                                     |                   |                                                                                                           |                                 |                  |            |
| 1250                           | Amide III                            | -                                           |                   |                                                                                                           |                                 |                  |            |
| 1083, 1105, 1128, 1157         | C-N                                  | -                                           |                   | Ricin and ricin agglutinin/<br><i>Ricinus communis</i> seeds                                              | 488                             | Raman Laser      | 62         |
| 510, 525, 540                  | S-S                                  | Streching                                   |                   |                                                                                                           |                                 |                  |            |
| 993, 1348, 1591                | -                                    | -                                           |                   | Zhibaboshi                                                                                                |                                 |                  |            |
| 624, 1003, 1065                | -                                    | -                                           |                   | Chongmanjue                                                                                               |                                 |                  |            |
| 786, 1449, 1607                | -                                    | -                                           |                   | Abameclin Petroleumoil                                                                                    |                                 |                  |            |
| 1393                           | -                                    | -                                           |                   | Cypermethrin<br>/pear,grapes, apple, longan,<br>spicy-pear, Chinese<br>goosebeery, orange, banana<br>etc. | 1064                            | FT-Raman         | 63         |
| 1068                           | B-O                                  | Symmetric streching<br>Asymmetric streching |                   |                                                                                                           |                                 |                  |            |
| 1220.7                         | C-O                                  |                                             |                   | T-2 Toxin/-                                                                                               | 785                             | Raman Microscope | 64         |
| 934                            | Cl-O                                 | Symmetric streching                         |                   |                                                                                                           |                                 |                  |            |
|                                |                                      |                                             |                   | Perchlorate /Ground waters                                                                                | 670                             | Raman            | 65         |

|                          |                              |                                                             |                             |                                      |           |             |    |
|--------------------------|------------------------------|-------------------------------------------------------------|-----------------------------|--------------------------------------|-----------|-------------|----|
| 708                      | NH2                          | Twisting                                                    | Weak                        |                                      |           |             |    |
| 665                      | H2C                          | Twisting                                                    | Weak                        |                                      |           |             |    |
| 490                      | C-O                          | Torsion                                                     | -                           | Acrylamide/-                         | 514.5-488 | Raman laser | 66 |
| 215                      | C-O                          | Torsion                                                     | Weak                        |                                      |           |             |    |
| 819                      | CH                           | Wagging                                                     | Medium                      |                                      |           |             |    |
| 963                      | CH2                          | Wagging                                                     | Weak                        |                                      |           |             |    |
| 3066                     | CH                           | Streching                                                   | Strong                      |                                      |           |             |    |
| 2921                     | CH3                          | Asymetric strech                                            | Medium                      |                                      |           |             |    |
| 1699                     | C=O                          | Streching                                                   | Strong                      |                                      |           |             |    |
| 1571                     | C-C                          | Streching                                                   | Very strong                 | 6-Methyl-4-bromomethylco<br>umarin/- | 1064      | FT-Raman    | 67 |
|                          |                              | Skel def                                                    |                             |                                      |           |             |    |
| 2983-3050                | CH2Br                        | Streching                                                   | Weak                        |                                      |           |             |    |
| 1194                     | CH2Br                        | Deformation                                                 | Strong                      |                                      |           |             |    |
| 96                       | CH3                          | Torsion Skel def                                            | Very strong                 |                                      |           |             |    |
| 766                      | -                            | -                                                           |                             | Naphthalene/-                        |           |             |    |
| 399, 756, 1407           | -                            | -                                                           | Strong                      | Anthracene/-                         |           | UV          |    |
| 386, 745, 1386           | -                            | -                                                           | Strong                      | Phenanthrene/-                       |           | resonance   |    |
| 582,1393, and<br>1622    | -                            | -                                                           |                             | Pyrene/-                             | 1064      | Raman       | 68 |
| 1513, 1156, 1008         | v (C C), v (C-C),<br>(C-CH3) | Stretching, Stretching<br>rocking                           | Strong,<br>strong<br>medium | Beta-carotene/-                      |           |             |    |
| 1406, 1142, 407          | C C, CH                      | in-plane vibration,<br>skeletal ring vibrations,<br>bending | Strong<br>Medium            | Pyrene/-                             |           |             |    |
| 3054, 1627,<br>1594, 592 |                              |                                                             |                             |                                      |           |             |    |
| 1401, 394                | C C, CCC                     | in-plane vibration,<br>bending                              | Strong,<br>medium           | Anthracene/-                         | 1064      | FT-Raman    | 69 |
| 3055, 1381               | CH, C C                      | stretching, in-plane<br>vibration                           | Strong                      |                                      |           |             |    |
| 1576, 1463, 1020         | C=C ,<br>=C-H                | stretching, in-plane<br>deformation vibration               | medium                      | Napthalene/-                         |           |             |    |

|      |                                                         |                      |   |                    |     |       |    |
|------|---------------------------------------------------------|----------------------|---|--------------------|-----|-------|----|
| 686  | C-H                                                     | out of plane bending | - |                    |     |       |    |
| 760  | C-H                                                     | out of plane bending | - |                    |     |       |    |
| 828  | -                                                       | ring deformation     | - |                    |     |       |    |
| 956  | $\nu(\text{C-C})$                                       | -                    | - | Aflatoxin in maize | 785 | Raman | 70 |
| 1440 | $\beta(\text{C-H})$                                     | ring mode            | - |                    |     |       |    |
| 1460 | $\beta(\text{C-H})$                                     | ring mode            | - |                    |     |       |    |
| 1612 | $\nu(\text{C-C})$                                       | ring mode            | - |                    |     |       |    |
| 1760 | $\nu(\text{C=O})$                                       | ring mode            | - |                    |     |       |    |
| 3015 | CH3                                                     | -                    |   |                    |     |       |    |
| 2938 | CH3                                                     | -                    |   |                    |     |       |    |
| 2844 | CH3                                                     | -                    |   |                    |     |       |    |
| 1454 | CH3                                                     | -                    |   |                    |     |       |    |
| 1216 | $\nu(\text{PO})_2 + \text{CH}_3$                        | Stretching           |   |                    |     |       |    |
| 1066 | CH3                                                     | -                    |   |                    |     |       |    |
| 1036 | CH3                                                     | -                    |   |                    |     |       |    |
| 946  | $\nu(\text{CO}_3) + \nu\text{O}_3\text{P}$              | Stretching           |   |                    |     |       |    |
| 786  | $\nu\text{SC} + \text{NH}_2$                            | Stretching           |   | Metamidophos       | 633 | Raman | 71 |
| 712  | $\nu\text{O}_3 + \text{NH}_2$                           | Stretching           |   |                    |     |       |    |
| 615  | $\nu\text{PS} + \nu\text{NP}$                           | Stretching           |   |                    |     |       |    |
| 576  | $\nu\text{CS} + \nu\text{PS}$                           | Stretching           |   |                    |     |       |    |
| 3261 | N-H                                                     | Stretching           |   |                    |     |       |    |
| 3252 | N-H                                                     | Stretching           |   |                    |     |       |    |
| 3265 | N-H                                                     | Stretching           |   |                    |     |       |    |
| 3112 | $\nu\text{C}_{52}\text{-H} + \nu\text{C}_{53}\text{-H}$ | -                    |   |                    |     |       |    |
| 2974 | $\nu\text{C}_{51}\text{-H}$                             | -                    |   |                    |     |       |    |
| 2939 | $\nu\text{C}_{51}\text{-H}$                             | -                    |   |                    |     |       |    |
| 2871 | $\nu\text{sC-H}$                                        | -                    |   |                    |     |       |    |
| 2719 | $\nu\text{sC-H}$                                        | -                    |   |                    |     |       |    |
| 3182 | $\nu\text{sCH}_3$                                       | -                    |   |                    |     |       |    |
| 3087 | $\nu\text{C}_{52}(53)\text{-H}$                         | Stretching           |   |                    |     |       |    |
| 3019 | $\nu\text{C}_{51}\text{-H}$                             | Stretching           |   |                    |     |       |    |
| 2982 | $\nu\text{C}_{52}(53)\text{-H}$                         | Stretching           |   |                    |     |       |    |
| 2972 | $\nu\text{C}_{51}\text{-H}$                             | Stretching           |   |                    |     |       |    |
| 2935 | $\nu\text{C}_{31}\text{-H} + \nu\text{C}_{32}\text{-H}$ | Stretching           |   |                    |     |       |    |

|                         |                                         |                      |                      |      |       |    |
|-------------------------|-----------------------------------------|----------------------|----------------------|------|-------|----|
| 2913                    | H+vC33-H<br>vC51-H+vC52-<br>H+vC53-H    | Stretching           |                      |      |       |    |
| 2874                    | C-H                                     | Stretching           |                      |      |       |    |
| 2760                    | $\delta$ H-C-C                          | Stretching           |                      |      |       |    |
| 2461                    | vC31-H                                  | Stretching           |                      |      |       |    |
| 3100                    | vC52-H+vC51-<br>H                       | Stretching           |                      |      |       |    |
| 2976                    | vcC52(C32)-H                            | Stretching           |                      |      |       |    |
| 2938                    | vs(C51(C31)-H                           | Stretching           |                      |      |       |    |
| 2877                    | C-H                                     | Stretching           |                      |      |       |    |
| 2746                    | v(C-H)                                  | Stretching           |                      |      |       |    |
| 2457                    | v(C-C)                                  | Stretching           | Atrazine, Prometryn, |      |       |    |
| 1610                    | $\delta$ C3-N3-H                        | Deformation in plane | Simetryn triazine    | 1064 | Raman | 72 |
| 1599                    | $\delta$ C5-N5-H                        | Deformation in plane |                      |      |       |    |
| 1550                    | vC5-N6, vC3-<br>N2                      | In phase, in plane   |                      |      |       |    |
| 1448                    | $\delta$ CH3                            | In plane bending     |                      |      |       |    |
| 1388                    | $\delta$ CH3                            | In plane bending     |                      |      |       |    |
| 1378                    | $\delta$ C-C-H                          | In plane bending     |                      |      |       |    |
| 1343                    | vC-Cl                                   | Stretching           |                      |      |       |    |
| 1168                    | $\delta$ C-C-H                          | In plane bending     |                      |      |       |    |
| 1127                    | $\delta$ C-C-H                          | In plane bending     |                      |      |       |    |
| 1084                    | $\delta$ N-C-H                          | In plane bending     |                      |      |       |    |
| 993                     | $\delta$ C-C-H                          | In plane bending     |                      |      |       |    |
| 1343,1310,1251,<br>1168 | vC1-C1                                  | Stretching           |                      |      |       |    |
| 924                     | vC-Cl                                   | Stretching           |                      |      |       |    |
| 648                     | $\delta$ N6-C1-N2,<br>$\delta$ C5-N4-C3 | In plane bending     |                      |      |       |    |
| 253                     | C53-H, C52-H                            | -                    |                      |      |       |    |
| 1621                    | $\delta$ C3-N3-H                        | In plane bending     |                      |      |       |    |
| 1606                    | $\delta$ C5-N5-                         | In plane bending     |                      |      |       |    |



|           |                |                                  |       |     |       |    |
|-----------|----------------|----------------------------------|-------|-----|-------|----|
| 1581      | vC5-N6         | Out of and in phase              |       |     |       |    |
| 1547      | vC3-N2         | Out of and in phase              |       |     |       |    |
| 1462      | $\delta$ CH3   | In plane bending                 |       |     |       |    |
| 1350      | $\delta$ C-C-H | In plane bending                 |       |     |       |    |
| 1182      | C-S            | Stretching                       |       |     |       |    |
| 1133      | C-S            | Stretching                       |       |     |       |    |
| 971       | -              | Ring Breathing                   |       |     |       |    |
| 993       | -              | Ring Breathing                   |       |     |       |    |
| <700      | -              | Skeletal modes of ring structure |       |     |       |    |
| 828       | -              | Ring deformation                 | Maize | 785 | Raman | 73 |
| 956       | v(C-C)         | -                                |       |     |       |    |
| 1080      | v(C-O)         | -                                |       |     |       |    |
| 1400-1500 | $\beta$ (C-H)  | Ring mode                        |       |     |       |    |

**Table 7S. Raman spectra of food additives**

| Band position cm <sup>-1</sup> | Assignment of Bonds (Molecule/Group) | Mode of Vibration                                                            | Strength of bonds | Sample / Food Matrix                    | Wavenumber of laser source (nm) | Type of Raman   | References |
|--------------------------------|--------------------------------------|------------------------------------------------------------------------------|-------------------|-----------------------------------------|---------------------------------|-----------------|------------|
| -                              | C=C                                  | C=C Stretching                                                               | -                 | Astaxanthin and Cantaxanthin/<br>Salmon | -                               | Resonance Raman | 74         |
| 1600                           | -                                    | Naph (1) ring stretching                                                     | Strong            |                                         |                                 |                 | 75         |
| 1575                           | -                                    | Naph (2) ring stretching<br>O12-H19 i. p. bend +<br>Naph (2) ring stretching | Very Strong       |                                         |                                 |                 |            |
| 1515                           | -                                    | Naph (1) ring stretching<br>C3-O12 stretching +<br>Naph (2) ring stretching  | Very Strong       |                                         |                                 |                 |            |
| 1459                           | -                                    | N11-N28 stretching +<br>Naph (2) stretching                                  | Strong            | Amaranth/-                              | -                               | FT-Raman        |            |
| 1442                           | -                                    | C2-N11 stretching +                                                          | Strong            |                                         |                                 |                 |            |

|                                    |                               |                                                                                                                          |                                                                       |                        |       |                                     |    |
|------------------------------------|-------------------------------|--------------------------------------------------------------------------------------------------------------------------|-----------------------------------------------------------------------|------------------------|-------|-------------------------------------|----|
| 1365                               | -                             | CH Naph (2)<br>i.p.bending                                                                                               | Very very                                                             |                        |       |                                     |    |
| 1300                               | -                             | CH Naph (1)<br>i.p.bending + C29-N28<br>stretching                                                                       | Strong<br>Strong                                                      |                        |       |                                     |    |
| 1240                               | -                             |                                                                                                                          | Very Strong                                                           |                        |       |                                     |    |
| 1598                               | -                             | Phenyl ring stretching                                                                                                   | Very strong                                                           |                        |       |                                     |    |
| 1502<br>1357<br>1129               | -<br>C-N8=N9-C<br>-           | Phenyl ring bending<br>Stretching<br>Out of plane C-H<br>deformation                                                     | Strong<br>Strong<br>Strong                                            | Tartrazine/-           | 1064  | FT-Raman                            | 76 |
| 1500-1700                          | -                             | -                                                                                                                        | Strong                                                                | Deuterated maltol/-    | 1064  | FT-Raman                            | 77 |
| 3100-3350                          | O-H                           | Stretching                                                                                                               | Very weak                                                             | Maltol/-               | 1064  | FT-Raman                            | 77 |
| 2943<br>1407<br>1341<br>931<br>180 | -<br>COO-<br>-<br>-<br>COO-   | Symmetrical CH2<br>stretching<br>Symmetrical stretching<br>CH2 deformation<br><br>Completely ionized<br>form<br>Twisting | Very strong<br>Very strong<br>Strong<br>Strong<br>Very very<br>strong | Monosodium glutamate/- | 514.5 | Raman<br>micro-<br>spectromete<br>r | 78 |
| 3063<br>3054<br>2955<br>2948       | CH<br>CH<br>C6H2, C5H<br>C6H2 | Symmetrical phenyl<br>ring<br>In plane phenyl ring<br>bending<br>Symmetrical phenyl<br>ring<br>Symmetrical phenyl        | Strong<br>Strong<br>Strong<br>Very strong                             | Aspartame/-            | 514.5 | Raman<br>microspectr<br>ometer      | 79 |

|      |                                                  |                                                |                     |               |       |                       |    |
|------|--------------------------------------------------|------------------------------------------------|---------------------|---------------|-------|-----------------------|----|
| 1005 | C5C6C13                                          | ring<br>Torsion                                | Very very<br>strong |               |       |                       |    |
| 90   | CH <sub>3</sub>                                  | Rocking                                        | Very very<br>strong |               |       |                       |    |
| 61   | -                                                | Skeletal deformation                           | Very very<br>strong |               |       |                       |    |
| 57   | -                                                | Skeletal deformation                           | Very very<br>strong |               |       |                       |    |
| 42   | -                                                | C13O19, C13O18, CH <sub>3</sub><br>deformation | Very very<br>strong |               |       |                       |    |
| 1653 | C=O                                              | Stretching                                     | Strong              |               |       |                       |    |
| 1585 | COOH                                             | Asymmetric stretching<br>vibration             | Weak                |               |       |                       |    |
| 1462 | CH <sub>2</sub> and CH <sub>3</sub>              | Deformations                                   | Very strong         |               |       |                       |    |
| 1442 | CH <sub>2</sub> and CH <sub>3</sub>              | Deformations                                   | Very strong         |               |       |                       |    |
| 1408 | C-C                                              | Stretching                                     | Very strong         | HMB/-         | 514.5 | Conventional<br>Raman | 80 |
| 1306 | C-H                                              | In-plane deformation                           | Strong              |               |       |                       |    |
| 1258 | COH                                              | Wagging                                        | Medium              |               |       |                       |    |
| 748  | CH <sub>2</sub>                                  | Rocking                                        | Very strong         |               |       |                       |    |
| 663  | COOH                                             | Wagging                                        | Strong              |               |       |                       |    |
| 632  | COH                                              | Deformation bending                            | Medium              |               |       |                       |    |
| 1584 | COOH                                             | Asymmetrical<br>stretching                     | Strong              |               |       |                       |    |
| 1463 | CH <sub>3</sub>                                  | Deformation                                    | Very strong         |               |       |                       |    |
| 1385 | C-C                                              | Stretching                                     | Strong              |               |       |                       |    |
| 1245 | COH                                              | Wagging                                        | Strong              |               |       |                       |    |
| 1195 | CCO                                              | Out of plane stretching<br>Stretching          | Strong              | L-carnitine/- | 514.5 | Conventional<br>Raman | 80 |
| 971  | C-N <sup>+</sup> (CH <sub>3</sub> ) <sub>3</sub> | Asymmetrical<br>stretching                     | Strong              |               |       |                       |    |
| 948  | C-N <sup>+</sup> (CH <sub>3</sub> ) <sub>3</sub> | Stretching                                     | Strong              |               |       |                       |    |
| 913  | C-COOH                                           | Rocking                                        | Strong              |               |       |                       |    |
| 772  | CH <sub>2</sub>                                  | Deformation bending                            | Very strong         |               |       |                       |    |
| 634  | COH                                              |                                                | Strong              |               |       |                       |    |

|                                                       |                                                           |                                          |   |             |         |     |             |
|-------------------------------------------------------|-----------------------------------------------------------|------------------------------------------|---|-------------|---------|-----|-------------|
| 522                                                   | S-S                                                       | -                                        | - |             |         |     |             |
| 505                                                   | S-S                                                       | -                                        | - |             |         |     |             |
| 1610-1700                                             | Amide I                                                   | -                                        | - |             |         |     |             |
| 1225-1330                                             | Amide III                                                 | -                                        | - | Human Serum | Albumin | 785 | Raman 81    |
| 3354                                                  | v(OH)HB                                                   | Stretching                               | - |             |         |     |             |
| 3292                                                  | v(OH)HB                                                   | Stretching                               | - |             |         |     |             |
| 2892                                                  | v(CH <sub>2</sub> )                                       | Stretching                               | - |             |         |     |             |
| 2736                                                  | v(CH)                                                     | Stretching                               | - |             |         |     |             |
| 1468                                                  | δ(CH)+ω(CH <sub>2</sub> )+<br>δ(OH)                       | In plane bending+out of<br>plane bending | - |             |         |     |             |
| 1414                                                  | δ(CH)+ δ(OH)                                              | In-plane bending                         | - |             |         |     |             |
| 1379                                                  | δ(CH <sub>2</sub> )+δ(CH)+<br>δ(OH)+v(Φ)                  | In-plane<br>bending+Stretching           | - |             |         |     |             |
| 1338                                                  | δ(CH)                                                     | In-plane bending                         | - |             |         |     |             |
| 1292-1267-1241                                        | δ(OH...O)+v(C-<br>C)+v(C-O)+<br>δ(CH)+ρ(CH <sub>2</sub> ) | In-plane<br>bending+stretching           | - | Cellulose   |         | -   | FT-Raman 82 |
| 1153-1119-1095-<br>1056-1036-1026-<br>995-972-911-898 | v(C-O-<br>C)+v(Φ)+v(C-<br>OH)+v(C-<br>CH <sub>2</sub> )+  | Stretching+ In-plane<br>bending          | - |             |         |     |             |
| 457                                                   | δ(CH)+ρ(CH <sub>2</sub> )                                 | In-plane bending                         | - |             |         |     |             |
| 437-379-352                                           | δ(COC)<br>γ(OH)+γ(φ)                                      | Out of plane bending                     | - |             |         |     |             |
| 2963                                                  | v(CH <sub>3</sub> )                                       | Stretching                               | - |             |         |     |             |
| 2935                                                  | v(CH <sub>3</sub> )                                       | Stretching                               | - |             |         |     |             |
| 2880                                                  | v(CH <sub>2</sub> )                                       | Stretching                               | - |             |         |     |             |
| 2719                                                  | v(CH)                                                     | Stretching                               | - |             |         |     |             |
| 1656                                                  | v(CO)AmI                                                  | Stretching                               | - |             |         |     |             |
| 1620                                                  | δ(NH)                                                     | In plane bending                         | - |             |         |     |             |
| 1451                                                  | δ(CH)+ω(CH <sub>2</sub> )+<br>δ(OH)                       | In plane +out of plane<br>bending        | - |             |         |     |             |
| 1415                                                  | δ(CH <sub>3</sub> )+ δ(CH)                                | In plane bending                         | - |             |         |     |             |
| 1377                                                  | δ(CH <sub>2</sub> )+                                      | In plane                                 | - |             |         |     |             |

|                 |                                                                                                                                                                 |                                                      |             |        |   |          |
|-----------------|-----------------------------------------------------------------------------------------------------------------------------------------------------------------|------------------------------------------------------|-------------|--------|---|----------|
| 1326            | $\delta(\text{CH})+$<br>$\delta(\text{OH})+\nu(\phi)$                                                                                                           | bending+Stretching<br>In plane                       | -<br>-      |        |   |          |
| 1265+1204       | $\nu(\text{CN})+\delta(\text{CH})$<br>$\delta(\text{OH}\cdots\text{O})+\nu(\text{C}-\text{C})+\nu(\text{C}-\text{O})+$<br>$\delta(\text{CH})+\rho(\text{CH}_2)$ | bending+Stretching<br>In plane<br>bending+Stretching | -<br>-<br>- |        |   |          |
| 1150+1112+1057  | $\nu(\text{C}-\text{O}-\text{C})+\nu(\phi)+\nu(\text{C}-\text{OH})+\nu(\text{C}-\text{CH}_2)+$<br>$\delta(\text{CH})+\rho(\text{CH}_2)+$<br>$\rho(\text{CH}_3)$ | In plane<br>bending+Stretching                       | -<br>-      | Chitin | - | FT-Raman |
| 1043            | $\rho(\text{CH}_3)$<br>$+\delta(\text{CH})+\delta(\text{OH})$                                                                                                   | In plane bending                                     | -           |        |   |          |
| 954             | $\nu(\text{CN})$                                                                                                                                                | Stretching                                           | -           |        |   |          |
| 896             | $\nu(\phi)+\rho(\text{CH}_2)$                                                                                                                                   | Stretching                                           | -           |        |   |          |
| 710             | $\omega(\text{NH}_2)+\delta(\phi)$                                                                                                                              | In and out of plane<br>bending                       | -<br>-      |        |   |          |
| 661+647+597     | $\gamma(\text{OH}\cdots\text{O})$                                                                                                                               | Out of plane bending                                 | -           |        |   |          |
| 501             | $\delta(\text{CO}-\text{NH})+\delta(\text{C}-\text{CH}_3)$                                                                                                      | In plane bending                                     | -           |        |   |          |
| 451+397+366+325 | $\gamma(\text{OH})+\gamma(\phi)$                                                                                                                                | Out of plane bending                                 | -           |        |   |          |
| 253             | $\delta(\text{C}-\text{NH}-\text{C})+\gamma(\text{OH})$                                                                                                         | In and out of plane<br>bending                       | -           |        |   |          |
| 3362            | $\nu(\text{OH})\text{HB}$                                                                                                                                       | Stretching                                           | -           |        |   |          |
| 2932            | $\nu(\text{NH}_2)$                                                                                                                                              | Stretching                                           | -           |        |   |          |
| 2885            | $\nu(\text{CH}_2)$                                                                                                                                              | Stretching                                           | -           |        |   |          |
| 2818            | $\nu(\text{NH}_2)$                                                                                                                                              | Stretching                                           | -           |        |   |          |
| 2743            | $\nu(\text{CH})$                                                                                                                                                | Stretching                                           | -           |        |   |          |
| 1654            | $\nu(\text{CO})$                                                                                                                                                | Stretching                                           | -           |        |   |          |
| 1591            | $\delta(\text{NH}_2)$                                                                                                                                           | In plane bending                                     | -           |        |   |          |
| 1458            | $\delta(\text{CH})+\omega(\text{CH}_2)+$<br>$\delta(\text{CH})+\delta(\text{OH})$                                                                               | In and out out plane<br>bending                      | -<br>-      |        |   |          |

|                |                                                                                                                    |                                            |   |          |          |  |
|----------------|--------------------------------------------------------------------------------------------------------------------|--------------------------------------------|---|----------|----------|--|
| 1411           | $\delta(\text{CH}_3)+\delta(\text{CH})$                                                                            | In plane bending                           | - |          |          |  |
| 1377           | $\delta(\text{CH}_2)+\delta(\text{CH})+$                                                                           | In plane bending and stretching            | - |          |          |  |
| 1325           | $\delta(\text{OH})+\nu(\phi)$                                                                                      | In plane bending and stretching            | - | Chitosan | FT-Raman |  |
| 1263           | $\nu(\text{CN})+\delta(\text{CH})$                                                                                 | In plane bending and stretching            | - |          |          |  |
| 1146+1114+1093 | $\delta(\text{OH}\dots\text{O})+\nu(\text{C}-\text{C})+\nu(\text{C}-\text{O})+\delta(\text{CH})+\rho(\text{CH}_2)$ | In plane bending and stretching            | - |          |          |  |
|                | $\nu(\text{C}-\text{O}-\text{C})+\nu(\phi)+\nu(\text{C}-\text{OH})+\nu(\text{C}-\text{CH}_2)+\delta(\text{CH})+$   |                                            | - |          |          |  |
| 1044           | $\rho(\text{CH}_3)+\rho(\text{CH}_2)$                                                                              | In plane bending and stretching            | - |          |          |  |
| 991            | $\nu(\phi)+\delta(\text{CH})+\delta(\text{OH})$                                                                    | In plane bending and stretching            | - |          |          |  |
| 936            | $\nu(\phi)+\delta(\text{CH})$                                                                                      | Stretching                                 | - |          |          |  |
| 896            | $\nu(\text{CN})$                                                                                                   | Stretching                                 | - |          |          |  |
| 703            | $\nu(\phi)+\rho(\text{CH}_2)$                                                                                      | In and out of plane bending                | - |          |          |  |
| 566            | $\omega(\text{NH}_2)+\delta(\phi)$                                                                                 | In and out of plane bending and stretching | - |          |          |  |
| 493            | $\gamma(\text{NH})+\nu(\text{C}=\text{O})+\omega(\text{CH}_3)$                                                     | In plane bending                           | - |          |          |  |
| 479            | $\delta(\text{CO}-\text{NH})+\delta(\text{C}-\text{CH}_3)$                                                         | In plane bending                           | - |          |          |  |
| 444+424+357    | $\delta(\text{COC})$                                                                                               | Out of plane bending                       | - |          |          |  |
| 285            | $\gamma(\text{OH})+\gamma(\phi)$                                                                                   | In and out of plane bending                | - |          |          |  |
|                | $\delta(\text{C}-\text{NH}-\text{C})+\gamma(\text{OH})$                                                            |                                            | - |          |          |  |
| 1151           | $\delta(\text{CCH}), \delta(\text{C}-\text{OH})$                                                                   | In plane bending                           | - |          |          |  |
| 1250           | $\delta(\text{CH})$ of $\text{C}=\text{CH}$ ,                                                                      | In plane bending and                       | - |          |          |  |

82

|      |                                                                   |                                            |   |                             |     |          |    |
|------|-------------------------------------------------------------------|--------------------------------------------|---|-----------------------------|-----|----------|----|
| 1317 | $\nu(\text{CCH})$                                                 | stretching                                 | - | Curcumin                    | 785 | FT-Raman | 83 |
| 1430 | $\delta(\text{CCH})$                                              | In plane bending                           | - |                             |     |          |    |
| 1600 | $\delta(\text{CCC}), \nu(\text{C=C})$                             | In plane bending                           | - |                             |     |          |    |
| 1627 | $\nu(\text{C=C}), \nu(\text{C=O})$                                | Stretching                                 | - |                             |     |          |    |
| 1528 | -                                                                 | -                                          | - | Carrot Roots                | 532 | Raman    | 84 |
| 1163 | -                                                                 | -                                          | - |                             |     |          |    |
| 1009 | -                                                                 | -                                          | - |                             |     |          |    |
| 958  | C-H                                                               | Out of plan                                | - |                             |     |          |    |
| 962  | $\delta\text{C-N=N}+\nu(\text{C-N})$                              | In plane bending, stretching               | - | Azodicarbonamide            | 785 | Raman    | 85 |
| 1120 | $\delta\text{H-N-H}+\nu(\text{C=O}+\nu(\text{C-N}))$              | -                                          | - |                             |     |          |    |
| 1332 | $\delta\text{H-N-H}+\nu\text{C-N}+\delta\text{N-C=O}$             | In plane bending, stretching               | - |                             |     |          |    |
| 1574 | $\nu\text{N=N}$                                                   | -                                          | - |                             |     |          |    |
| 1712 | $\delta\text{N-H}+\nu\text{C=O}$<br>$\nu\text{C=O}+\nu\text{C-N}$ | Stretching                                 | - |                             |     |          |    |
| 602  | $\delta\text{N-C=O}+\delta\text{N-C-N}+\delta\text{C-N-N}$        | In plane bending                           | - | Biurea                      | 785 | Raman    | 85 |
| 984  | $\nu\text{C-N}+\delta\text{C-N-N}$                                | In plane bending, stretching               | - |                             |     |          |    |
| 1092 | $\delta\text{NH}_2+\nu\text{C-N}+\nu\text{C=O}$                   | In plane bending, stretching               | - |                             |     |          |    |
| 1242 | $\nu\text{N-N}$<br>$\nu\text{C-N}+\nu\text{N-N}+\delta\text{N-H}$ | Stretching<br>In plane bending, stretching | - |                             |     |          |    |
| 1602 | $\nu\text{C-N}+\delta\text{N-H}+\nu\text{C=O}$                    | In plane bending, stretching               | - |                             |     |          |    |
| 1676 | $\nu\text{C-N}+\delta\text{N-H}+\nu\text{C=O}$                    | In plane bending, stretching               | - |                             |     |          |    |
| 508  | $\delta\text{N-C=O}+\delta\text{N-H}$                             | In plane bending                           | - | Semicarbazide hydrochloride | 785 | Raman    | 85 |
| 716  | $\delta\text{C-N}+\delta\text{N-H}$                               | In plane bending                           | - |                             |     |          |    |
| 936  | $\nu\text{C-N}$                                                   | Stretching                                 | - |                             |     |          |    |

|           |                                    |                              |          |      |          |    |
|-----------|------------------------------------|------------------------------|----------|------|----------|----|
| 1098      | vC-N                               | Stretching                   |          |      |          |    |
| 1184      | vC-N                               | Stretching                   |          |      |          |    |
| 1224      | vC-N                               | Stretching                   |          |      |          |    |
| 1388      | vC-N, $\delta$ N-C=O, $\delta$ N-H | In plane bending, stretching |          |      |          |    |
| 1538      | $\delta$ N-H                       | In plane bending             |          |      |          |    |
| 1952      | vN-H                               | Stretching                   |          |      |          |    |
| 1720      | C=O                                | Stretching                   |          |      |          |    |
| 1350      | HCO                                | -                            |          |      |          |    |
| 1200-1415 | CH <sub>2</sub> ,HCC,HCO,COH       | Deformation, Stretching      |          |      |          |    |
| 1116      | -                                  | Symmetric Stretching         |          |      |          |    |
| 1094      | -                                  | Symmetric Stretching         |          |      |          |    |
| 1123      | C=O                                | Stretching                   |          |      |          |    |
| 3311      | N-H                                | -                            |          |      |          |    |
| 2885      | C-H                                | Stretching                   | Chitosan | 1064 | FT Raman | 86 |
| 2917      | C-H                                | Stretching                   |          |      |          |    |
| 1070      | O=S=O                              | Stretching                   |          |      |          |    |
| 1014      | O=S=O                              | Stretching                   |          |      |          |    |
| 580       | O=S=O                              | Deformation                  |          |      |          |    |
| 610       | O=S=O                              | Deformation                  |          |      |          |    |
| 823       | C-O-S                              | Stretching                   |          |      |          |    |
| 834       | C-O-S                              | Stretching                   |          |      |          |    |



**Table 8S. Raman spectra of raw material**

| Band position $\text{cm}^{-1}$ | Assignment of Bonds (Molecule/Group) | Mode of Vibration                    | Strength of bonds | Sample / Food Matrix | Wavenumber of laser source (nm) | Type of Raman  | References |
|--------------------------------|--------------------------------------|--------------------------------------|-------------------|----------------------|---------------------------------|----------------|------------|
| 1745                           | C=O                                  | Stretching vibration                 | Weak              | - / Marama Bean Oil  | 1064                            | FT-Raman       | 87         |
| 1655                           | cis C=C                              | Stretching vibration                 | Medium            |                      |                                 |                |            |
| 1442                           | CH <sub>2</sub> bend                 | Bending vibration                    | Strong            |                      |                                 |                |            |
| 1265                           | =CH                                  | In-plane deformation                 | Medium            |                      |                                 |                |            |
| 1301                           | =CH                                  | (CH <sub>2</sub> ) wagging, twisting | Medium            |                      |                                 |                |            |
| 1008                           | HC-CH <sub>3</sub>                   | CH <sub>3</sub> bending              | Weak              | - / Oil              | 532                             | Confocal Raman | 88         |
| 1156                           | -(CH <sub>2</sub> ) <sub>n</sub> -   | C-C stretching                       | Medium            |                      |                                 |                |            |
| 1267                           | cis RHC=CHR                          | =C-H bending                         | Weak              |                      |                                 |                |            |
| 1302                           | -CH <sub>2</sub>                     | C-H bending                          | Medium            |                      |                                 |                |            |
| 1442                           | -CH <sub>2</sub>                     | C-H bending                          | Strong            |                      |                                 |                |            |
| 1522                           | RHC=CHR                              | C=C stretching                       | Medium            |                      |                                 |                |            |
| 1655                           | cis RHC=CHR                          | C=C stretching                       | Strong            |                      |                                 |                |            |
| 1747                           | RC=OOR                               | C=O stretching                       | Medium            |                      |                                 |                |            |
| 353                            | Unknown carbohydrate and protein     | -                                    | Weak              | - / Honey            | 1064                            | FT-Raman       | 89         |
| 423                            | Unknown carbohydrate and protein     | -                                    | Strong            |                      |                                 |                |            |
| 518                            | Unknown carbohydrate                 | -                                    | Strong            |                      |                                 |                |            |
| 630                            | Unknown carbohydrate                 | -                                    | Strong            |                      |                                 |                |            |
| 704                            | Unknown carbohydrate                 | -                                    | Weak              |                      |                                 |                |            |
| 775                            | Unknown carbohydrate                 | -                                    | Weak              |                      |                                 |                |            |
| 824                            | Unknown                              | -                                    | Weak              |                      |                                 |                |            |
| 866                            | C(1)H                                | Bending                              | Weak              |                      |                                 |                |            |

|      |                              |                      |        |                 |       |             |    |
|------|------------------------------|----------------------|--------|-----------------|-------|-------------|----|
| 915  | C(1)H and COH                | -                    | Weak   |                 |       |             |    |
| 981  | Unknown                      | Bending              | Weak   |                 |       |             |    |
| 1072 | C(1)H and COH                | -                    | Medium |                 |       |             |    |
|      | C-N (protein or amino acids) | -                    |        |                 |       |             |    |
| 1126 | Unknown carbohydrate         |                      | Medium |                 |       |             |    |
|      | C-N (protein or amino acids) |                      |        |                 |       |             |    |
| 1267 | C(6)OH and C(1)OH            | -                    | Medium |                 |       |             |    |
|      | Amide III (peptide bond)     | Bending              | Medium |                 |       |             |    |
| 1374 | CH and OH                    | Bending              | Medium |                 |       |             |    |
| 1461 | CH <sub>2</sub>              | -                    | Strong |                 |       |             |    |
|      | COO-                         | Stretching           | Strong |                 |       |             |    |
| 2945 | CH                           | Stretching           | Medium |                 |       |             |    |
| 3384 | OH                           | Stretching           | Weak   |                 |       |             |    |
| 3013 | =C-H                         | Stretching asymmetry | Medium |                 |       |             |    |
| 2909 | C-H                          | Stretching asymmetry | Strong |                 |       |             |    |
| 1750 | C=O                          | Stretching           | Weak   | - / Edible Oils | 1064  | FT-Raman    | 90 |
| 1660 | C=C                          | Stretching           | Medium |                 |       |             |    |
| 1294 | <i>cis</i> =C-H              | Bending              | Weak   |                 |       |             |    |
| 1447 | C-H                          | Bending              | Medium |                 |       |             |    |
| 1605 | Phenyl Ring                  | Stretching           | Strong |                 |       |             |    |
| 1630 | C=C                          | Stretching           | Strong |                 |       |             |    |
| 1120 | Cyclohexane CH, COH          | Bending              | Medium |                 |       |             |    |
| 1165 | Phenyl ring                  | Bending              | Medium |                 |       |             |    |
| 1193 | Phenyl ring CH, COH          | Bending              | Medium |                 |       |             |    |
| 1270 | Phenyl ring                  | Distortion vibration | Medium | - / Coffee      | 514.5 | Micro Raman | 91 |
| 1690 | C=O                          |                      | Medium |                 |       |             |    |
| 2905 | CH <sub>2</sub> of lipids    | Stretching           | Strong |                 |       |             |    |
| 2934 | CH <sub>2</sub> of lipids    | Symmetric            | Strong |                 |       |             |    |
| 3010 | Ethylenic group              | Vibration Asymmetric | Weak   |                 |       |             |    |

| Vibration |                 |                        |        |                        |      |          |    |
|-----------|-----------------|------------------------|--------|------------------------|------|----------|----|
| 3008      | Ethylenic group | Stretching             | Medium |                        |      |          |    |
| 2923      | C-H             | Stretching             | Strong |                        |      |          |    |
| 2893      | C-H             | Stretching             | Strong |                        |      |          |    |
| 2851      | C-H             | Stretching             | Strong |                        |      |          |    |
| 1750      | C=O             | Stretching             | Medium |                        |      |          |    |
| 1657      | C=C             | Stretching             | Weak   | - / Coffee             | 1064 | FT-Raman | 92 |
| 1440      | CH <sub>3</sub> | Deformation vibration  | Medium |                        |      |          |    |
| 1302      | CH <sub>2</sub> | Deformation vibration  | Weak   |                        |      |          |    |
| 1266      | CH              | Deformation vibration  | Weak   |                        |      |          |    |
| 879       | C-C             | Stretching             | Strong |                        |      |          |    |
| 1030      | C-O             | Stretching             | Medium |                        |      |          |    |
| 1079      | CH <sub>3</sub> | Rocking                | Weak   | - / Alcoholic beverage | 785  | Raman    | 93 |
| 1019      | C-O             | Stretching             | Medium |                        |      |          |    |
| 921       | C-C             | Skeletal vibration     | Weak   |                        |      |          |    |
| 317       | C-C-C           | Deformation            | -      |                        |      |          |    |
| 341       | C-C-O ring mode | Deformation            | -      |                        |      |          |    |
| 415-437   | C2-C1-O1        | Deformation bending    | -      |                        |      |          |    |
| 776       | C-C             | Stretching deformation | -      | Glucose / Honey        | 785  | Raman    | 94 |
| 790       | C1-H1           | Stretching             | -      |                        |      |          |    |
| 976-1028  | C-O             | Angel-bending          | -      |                        |      |          |    |
| 1106      | C-O-C           | model-deformation      | -      |                        |      |          |    |

|         |                           |                                            |        |                               |     |       |    |
|---------|---------------------------|--------------------------------------------|--------|-------------------------------|-----|-------|----|
| 314-353 | C-C-C ring vibration      | deformation                                | -      | Fructose / Honey              | 785 | Raman | 94 |
| 419     | C-C-O Ring vibration      | deformation                                | -      |                               |     |       |    |
| 744     | C-C                       | stretching                                 | -      |                               |     |       |    |
| 800     | C-C                       | stretching                                 | -      |                               |     |       |    |
| 911     | COH                       | deformation                                | -      |                               |     |       |    |
| 933     | C-O                       | stretching                                 | -      |                               |     |       |    |
| 1028    | C-O                       | stretching                                 | -      |                               |     |       |    |
| 1054    | C-O                       | stretching                                 | -      |                               |     |       |    |
| 341     | C-C-O Ring mode           | Deformation                                | -      | Maltose / Honey               | 785 | Raman | 94 |
| 434     | C2-C1-O1                  | Deformation                                | -      |                               |     |       |    |
| 544     | $\alpha$ -glycosidic bond |                                            | -      |                               |     |       |    |
| 842     | C-C                       | Stretching                                 | -      |                               |     |       |    |
| 855     | C1-H1                     | Deformation                                | -      |                               |     |       |    |
| 1028    | C-O                       | Stretching<br>vibration of<br>glucose ring | -      |                               |     |       |    |
| 451     | C-C-O                     | Deformation                                | -      | Glucose / Grape Juices        | 785 | Raman | 95 |
| 520     | C2-C1-O1                  | Deformation                                | -      |                               |     |       |    |
| 1063    | C-O                       | Stretching                                 | -      |                               |     |       |    |
| 629     | CCO exo                   | Deformation                                | -      | Fructose / Grape Juices       | 785 | Raman | 95 |
| 710     | CCO                       | Deformation                                | -      |                               |     |       |    |
| 821     | C-C                       | Stretching                                 | -      |                               |     |       |    |
| 870     | C-C                       | Stretching                                 | -      |                               |     |       |    |
| 879     | C-C                       | Stretching                                 | Strong | Ethanol / Grape Juices        | 785 | Raman | 95 |
| 1030    | C-O                       | Stretching                                 | Weak   |                               |     |       |    |
| 1079    | CH <sub>3</sub>           | Rocking                                    | Weak   |                               |     |       |    |
| 891     | C-C                       | Stretching                                 | Strong | Acetic acid / Grape<br>Juices | 785 | Raman | 95 |
| 632     |                           |                                            | weak   |                               |     |       |    |

|                |                             |                                  |   |                                                  |      |          |    |
|----------------|-----------------------------|----------------------------------|---|--------------------------------------------------|------|----------|----|
| 3000           | C-H                         | Stretching                       | - |                                                  |      |          |    |
| 3092           | =C-H                        | Stretching                       | - |                                                  |      |          |    |
| 3008           | C-H, C=C                    | Stretching                       | - |                                                  |      |          |    |
| 1676           | C=C                         | Stretching                       | - | - / Oil                                          | 785  | Raman    | 96 |
| 1500           | -                           | Stretching                       | - |                                                  |      |          |    |
| 1379,1293, 797 | C-H,C-C                     | -                                | - |                                                  |      |          |    |
| 932            | C-C                         | Stretching                       | - |                                                  |      |          |    |
| 974            | =C-H                        | Out of plan deformation          | - |                                                  |      |          |    |
| 1266           | =C-H                        | Symmetric rock                   | - | - / Caviar                                       | 785  | Raman    | 97 |
| 1302           | CH <sub>2</sub>             | Twisting                         | - |                                                  |      |          |    |
| 1442           | CH <sub>2</sub>             | Scissoring                       | - |                                                  |      |          |    |
| 1662           | C=C                         | Stretching                       | - |                                                  |      |          |    |
| 1262           | =C-H                        | Stretching                       | - |                                                  |      |          |    |
| 1604           | C=C                         | Stretching                       | - |                                                  |      |          |    |
| 1630           | C=C                         | Stretching                       | - |                                                  |      |          |    |
| 1690           | -                           | amide I bands of $\beta$ -sheet  | - | Kahweol / Green Arabica and Robusta Coffee Beans | 1064 | FT-Raman | 98 |
| 1656           | -                           | amide I bands of $\alpha$ -helix | - |                                                  |      |          |    |
| 1479           | -                           | -                                | - |                                                  |      |          |    |
| 1567           | -                           | -                                | - |                                                  |      |          |    |
| 853            | v(C-O-C)                    | Stretching                       | - |                                                  |      |          |    |
| 1003           | v(C-CH <sub>3</sub> )       | Stretching                       | - |                                                  |      |          |    |
| 1065           | v(C-C)                      | Stretching                       | - |                                                  |      |          |    |
| 1158           | v(C-C)                      | Stretching                       | - |                                                  |      |          |    |
| 1168           | Ring $\delta$ (CH)          | Deformation                      | - |                                                  |      |          |    |
| 1267           | $\delta$ (=C-H)             | Deformation                      | - |                                                  |      |          | 99 |
| 1303           | $\tau$ (CH <sub>2</sub> )   | Twisting                         | - |                                                  |      |          |    |
| 1439           | $\delta$ (CH <sub>2</sub> ) | Deformation                      | - |                                                  |      |          |    |
| 1521           | v(C=C)                      | Stretching                       | - |                                                  |      |          |    |
| 1587           | Aromatic v(C-C)             | Stretching                       | - |                                                  |      |          |    |
| 1605           | Aromatic Ring               | -                                | - |                                                  |      |          |    |
| 1623           | C=C                         | Stretching                       | - |                                                  |      |          |    |

|      |                           |                  |   |                      |     |                |
|------|---------------------------|------------------|---|----------------------|-----|----------------|
| 1630 | v(C=C)                    | Stretching       | - |                      |     |                |
| 1720 | v(C=O)                    | Stretching       | - |                      |     |                |
| 2727 | v(CH)                     | Stretching       | - |                      |     |                |
| 2853 | v(CH <sub>2</sub> )       | Stretching       | - |                      |     |                |
| 2904 | v(CH <sub>3</sub> )       | Stretching       | - |                      |     |                |
| 2921 | v(CH <sub>2</sub> )       | Stretching       | - | Organic Compounds /  | 514 | Confocal Raman |
| 915  | C-C-C                     | Bending          | - | Red and Green Tomato |     |                |
|      |                           | Deformation      | - |                      |     |                |
| 1623 | C=C                       | Stretching       | - |                      |     |                |
|      |                           |                  | - |                      |     |                |
| 744  | δ(N-C-C)                  | Deformation      | - |                      |     |                |
| 915  | δ(C-C-C)                  | Deformation      | - |                      |     |                |
| 958  | -                         | -                | - |                      |     |                |
| 964  | -                         | -                | - |                      |     |                |
| 985  | δ(CH <sub>3</sub> )       | Deformation      | - |                      |     |                |
| 1325 | δ(CH)                     | Deformation      | - |                      |     |                |
| 1371 | ω(CH <sub>2</sub> )       | Wagging          | - |                      |     |                |
| 1553 | v(C=C)                    | Stretching       | - |                      |     |                |
| 853  | vas(C-O-C)                | Stretching       | - |                      |     |                |
| 958  | pip(CH <sub>3</sub> )(v4) | In plane rocking | - |                      |     |                |
| 964  | pip(CH <sub>3</sub> )(v4) | In plane rocking | - |                      |     |                |
| 1007 | v(C-CH <sub>3</sub> )(v3) | Stretching       | - |                      |     |                |
| 1062 | v(C-C)                    | Stretching       | - |                      |     |                |
| 1156 | v(C-C)(v2)                | Stretching       | - |                      |     |                |
| 1167 | Ring δip(CH)              | Deformation      | - |                      |     |                |
| 1269 | V4 δip(=C-H)              | Deformation      | - |                      |     |                |
| 1441 | δ(CH <sub>2</sub> )       | Deformation      | - |                      |     |                |
| 1518 | v(C=C)(v1)                | Stretching       | - |                      |     |                |
| 1585 | v(C-C)                    | Stretching       | - | Organic Compounds /  | 785 | Confocal Raman |
| 1606 | Ring                      | -                | - | Red and Green Tomato |     |                |
| 1720 | v(C=O)                    | Stretching       | - |                      |     |                |
| 2311 | 2v2                       | Stretching       | - |                      |     |                |
| 2854 | v(CH <sub>2</sub> )       | Stretching       | - |                      |     |                |
| 2906 | v(CH <sub>3</sub> )       | Stretching       | - |                      |     |                |

|                                                                        |                                                                                    |                                                                                                                    |                                      |                              |     |       |     |
|------------------------------------------------------------------------|------------------------------------------------------------------------------------|--------------------------------------------------------------------------------------------------------------------|--------------------------------------|------------------------------|-----|-------|-----|
| 1078, 1124<br>1657                                                     | C-C, C-N, C-O<br>Amide I                                                           | -<br>-                                                                                                             | -<br>-                               | Protein and Oil /<br>Soybean | 785 | Raman | 100 |
| 1241<br>1997<br>3275<br>3261<br>3300<br>3397-3309<br>1132-1207<br>1196 | N-H<br>O-H<br>N-H<br>N-H<br>N-H<br>O-H<br>Amide III<br>C-O, C-O-C, NH <sub>2</sub> | Stretching<br>Stretching<br>Stretching<br>Stretching<br>Stretching<br>Stretching<br>Stretching<br>Stretching       | -<br>-<br>-<br>-<br>-<br>-<br>-<br>- | - / Meat                     | 633 | Raman | 101 |
| 220-200<br>1078<br>1122<br>1155-960<br>922<br>867                      | CH <sub>2</sub> -OH<br>C-O<br>C-O<br>P-OH<br>P-O-C<br>P-O-C                        | Torsial Vibration<br>Stretching<br>Stretching<br>Stretching<br>Asymmetric<br>Stretching<br>Symmetric<br>Stretching | -<br>-<br>-<br>-<br>-<br>-<br>-<br>- | - / Yogurt                   | 785 | Raman | 102 |
| 2336<br>1557<br>4160<br>2925<br>1391                                   | -<br>-<br>H-H<br>C-H<br>C=O                                                        | -<br>-<br>Stretching<br>Stretching<br>Stretching                                                                   | -<br>-<br>-<br>-<br>-                | - / Fermentation Gases       | 488 | Raman | 103 |

|          |                                             |                             |   |                                     |       |                 |     |
|----------|---------------------------------------------|-----------------------------|---|-------------------------------------|-------|-----------------|-----|
| 1374     | -                                           | Stretching                  | - | Nitrosylmyoglobin /<br>Meat         | 457.9 | Resonance Raman | 104 |
| 1585     | -                                           | Stretching                  | - |                                     |       |                 |     |
| 1632     | -                                           | Stretching                  | - |                                     |       |                 |     |
| 1370     | -                                           | Stretching                  | - |                                     |       |                 |     |
| 1380     | -                                           | Stretching                  | - |                                     |       |                 |     |
| 1630     | -                                           | Stretching                  | - |                                     |       |                 |     |
| 1267     | cis $\delta(=CH)$                           | Symmetric rock              | - | Oxidation Parameters /<br>Olive oil | 785   | Raman           | 105 |
| 1302     | -                                           | In-phase twist<br>methylene | - |                                     |       |                 |     |
| 1442     | $\delta(CH_2)$                              | Scissoring                  | - |                                     |       |                 |     |
| 1655     | $\nu(C=C)$                                  | Scissoring                  | - |                                     |       |                 |     |
| 1747     | $\nu(C=O)$                                  | Stretching                  | - |                                     |       |                 |     |
| 212      | -                                           | -                           | - | Adulterants / Dry Milk              | 785   | Raman           | 106 |
| 673      | -                                           | -                           | - |                                     |       |                 |     |
| 973      | -                                           | -                           | - |                                     |       |                 |     |
| 1009     | -                                           | -                           | - |                                     |       |                 |     |
| 514      | $\nu$ S-S gauche-gauche-gauche conformation | -                           | - | Myofibrillar proteins /<br>Pork     | 514.5 | Raman           | 107 |
| 530      | $\nu$ S-S gauche-gauche-trans conformation  | -                           | - |                                     |       |                 |     |
| 547      | $\nu$ S-S trans-gauche-trans conformation   | -                           | - |                                     |       |                 |     |
| 630-670  | $\nu$ S-S gauche conformation               | -                           | - |                                     |       |                 |     |
| 825, 852 | Tyr $\nu$ -ring                             | -                           | - |                                     |       |                 |     |
| 758, 882 | Trp $\nu$ -ring                             | -                           | - |                                     |       |                 |     |
| 932      | $\nu$ CC                                    | -                           | - |                                     |       |                 |     |
| 1003     | $\alpha$ -helix                             | -                           | - |                                     |       |                 |     |
| 1034     | Phe $\nu$ -ring                             | -                           | - |                                     |       |                 |     |
| 1063     | $\nu$ CN, $\nu$ CH $\nu$ CN                 | -                           | - |                                     |       |                 |     |
| 1126     | Amide III ( $\beta$ -helix)                 | -                           | - |                                     |       |                 |     |
| 1244     | Amide III ( $\alpha$ -helix)                | -                           | - |                                     |       |                 |     |
| 1304     | $\delta$ CH                                 | -                           | - |                                     |       |                 |     |



|            |                     |             |   |                           |     |       |     |
|------------|---------------------|-------------|---|---------------------------|-----|-------|-----|
| 1322, 1340 | vCOO– Asp, Glu      | -           | - |                           |     |       |     |
| 1410       | δasCH3, δCH2, and   |             |   |                           |     |       |     |
| 1450       | δCH                 | -           | - |                           |     |       |     |
|            | Amide I             | -           | - |                           |     |       |     |
| 1600–1700  | vCH3, vCH2, and     | -           | - |                           |     |       |     |
| 2936       | vCH2                |             |   |                           |     |       |     |
| 1749       | ν (C=O)             | Stretching  | - |                           |     |       |     |
| 1651       | ν(C=C)              | Stretching  | - |                           |     |       |     |
| 1439       | CH <sub>2</sub>     | Scissoring  | - |                           |     |       |     |
|            |                     | Deformation |   |                           |     |       |     |
| 1303       | CH <sub>2</sub>     | Twisting    | - |                           |     |       |     |
|            |                     | Deformation |   |                           |     |       |     |
| 1267       | δ (=C-H)            | Scissoring  | - | Maturation Stages / Olive |     |       |     |
|            |                     | deformation |   | Oil                       | 488 | Raman | 108 |
| 1009       | C-CH <sub>3</sub>   | Deformation | - |                           |     |       |     |
| 1150       | ν(C-C)              | -           | - |                           |     |       |     |
| 1523       | ν(C=C)              | -           | - |                           |     |       |     |
| 1300       | CH <sub>3</sub>     | Twisting    |   |                           |     |       |     |
| 1500-1400  | CH <sub>2</sub>     | Scissoring  |   |                           |     |       |     |
| 1200-1050  | C-C                 | Stretching  |   |                           |     |       |     |
| 3100-2800  | C-H                 | Stretching  |   |                           |     |       |     |
| 1440       | CH <sub>2</sub>     | Stretching  |   |                           |     |       |     |
| 1643       | C=O                 | -           |   |                           |     |       |     |
| 2870       | C-H                 | Stretching  |   |                           |     |       |     |
| 1060-1090  | ν(C-C)              | Stretching  |   |                           |     |       |     |
| 1110-1180  | δ(CH <sub>3</sub> ) | Deformation |   |                           |     |       |     |
| 1400-1500  | δ(CH <sub>2</sub> ) | Deformation |   |                           |     |       |     |
| 1130       | C-C                 | Stretching  |   |                           |     |       |     |
| 1178       | C-C                 | Stretching  |   |                           |     |       |     |
| 1653-1672  | C=C                 | Stretching  |   |                           |     |       |     |
| 2832-2888  | CH <sub>2</sub>     | Stretching  |   |                           |     |       |     |
| 2090-2967  | CH <sub>3</sub>     | Stretching  |   |                           |     |       |     |
| 3000       | =C-H                | Stretching  |   |                           |     |       |     |
| 1260       | =C-H                | Deformation |   |                           |     |       |     |

|      |                        |             |            |           |       |     |
|------|------------------------|-------------|------------|-----------|-------|-----|
| 1655 | C=C                    | Stretching  |            |           |       |     |
| 1086 | C-C                    | Stretching  |            |           |       |     |
| 1068 | C-C                    | Stretching  |            |           |       |     |
| 1120 | C-C                    | Stretching  |            |           |       |     |
| 1655 | n(C=C)                 | -           |            |           |       |     |
| 1444 | n(CH <sub>2</sub> )    | -           |            |           |       |     |
| 898  | CH <sub>2</sub>        | Rocking     |            |           |       |     |
| 912  | CH <sub>2</sub>        | Rocking     |            |           |       |     |
| 1294 | CH <sub>2</sub>        | Twisting    |            |           |       |     |
| 1433 | C-H                    | Bending     |            |           |       |     |
| 1409 | CH <sub>2</sub>        | Bending     |            |           |       |     |
| 1426 | -                      | -           |            |           |       |     |
| 3005 | =C-H                   | Stretching  |            |           |       |     |
| 1265 | =C-H                   | Stretching  | - / Lipids | 532, 1064 | Raman | 109 |
| 2850 | v(C-H)                 | Symmetric   |            |           |       |     |
| 2890 | v(C-H)                 | Asymmetric  |            |           |       |     |
| 3003 | =C-H                   | Stretching  |            |           |       |     |
| 2923 | CH <sub>2</sub>        | Stretching  |            |           |       |     |
| 2858 | CH <sub>2</sub>        | Symmetric   |            |           |       |     |
| 2875 | CH <sub>2</sub>        | Symmetric   |            |           |       |     |
| 1064 | C-C                    | Stretching  |            |           |       |     |
| 1116 | C-C                    | Stretching  |            |           |       |     |
| 890  | CH <sub>3</sub>        | Rocking     |            |           |       |     |
| 2846 | C-H in CH <sub>2</sub> | Symmetric   |            |           |       |     |
| 2934 | C-H in CH <sub>3</sub> | Symmetric   |            |           |       |     |
| 1729 | C=O                    | Stretching  |            |           |       |     |
| 1742 | C=O                    | Stretching  |            |           |       |     |
| 1746 | C=O                    | Stretching  |            |           |       |     |
| 1440 | CH <sub>2</sub>        | Scissoring  |            |           |       |     |
| 1304 | -                      | Twisting    |            |           |       |     |
| 1266 | =C-H                   | Deformation |            |           |       |     |
| 1269 | =C-H                   | Deformation |            |           |       |     |
| 1067 | C-C                    | Stretching  |            |           |       |     |
| 1079 | C-C                    | Stretching  |            |           |       |     |
| 1114 | C-C                    | Stretching  |            |           |       |     |

|          |                 |                      |
|----------|-----------------|----------------------|
| 1069     | C-C             | Stretching           |
| 1082     | C-C             | Stretching           |
| 1118     | C-C             | Stretching           |
| 3001     | =C-H            | Stretching           |
| 1656     | C=C             | Stretching           |
| 1267     | C-H             | In plane bending     |
| 1252     | -               | -                    |
| 1672     | C=C             | Stretching           |
| 3011     | =C-H            | Stretching           |
| 1660     | C=C             | Stretching           |
| 1062     | C-C             | Stretching           |
| 2864     | CH <sub>2</sub> | Symmetric            |
| 2930     | CH <sub>3</sub> | Symmetric            |
| 1442     | CH <sub>2</sub> | Stretching           |
| 1087     | C-C             | Stretching           |
| 1130     | C-H             | Stretching           |
| 1178     | C-H             | Stretching           |
| 800-1000 | C-H             | Backbone             |
| 701      | -               | In plane deformation |
| 424      | C-H             | Bending              |
| 548      | C-H             | Bending              |
| 2846     | CH <sub>2</sub> | Stretching           |
| 2881     | CH <sub>2</sub> | Stretching           |
| 2937     | CH <sub>3</sub> | Stretching           |
| 2957     | CH <sub>3</sub> | Stretching           |
| 1739     | C=O             | Stretching           |
| 1668     | C=C             | Stretching           |
| 1298     | CH <sub>2</sub> | Twisting             |
| 2852     | CH <sub>2</sub> | Stretching           |
| 2885     | CH <sub>2</sub> | Stretching           |
| 1741     | C=C             | Stretching           |
| 3009     | =C-H            | Stretching           |
| 1670     | v(C=C)          | -                    |
| 1659     | v(C=C)          | -                    |

|           |                                 |                      |          |     |       |     |
|-----------|---------------------------------|----------------------|----------|-----|-------|-----|
| 1306      | CH <sub>2</sub>                 | Stretching           |          |     |       |     |
| 1441      | CH <sub>2</sub>                 | Bending              |          |     |       |     |
| 3013      | =CH                             | Stretching           |          |     |       |     |
| 1662      | C=C                             | Backbone             |          |     |       |     |
| 1306      | CH <sub>2</sub>                 | Twisting             |          |     |       |     |
| 431       | C-C                             | -                    |          |     |       |     |
| 703       | C-H                             | -                    |          |     |       |     |
| 2600-3200 | C-H                             | -                    |          |     |       |     |
| 2847      | CH <sub>2</sub>                 | Symmetric            |          |     |       |     |
| 2882      | CH <sub>2</sub>                 | -                    |          |     |       |     |
| 2959      | CH <sub>3</sub>                 | Asymmetric           |          |     |       |     |
| 3007      | =CH                             | Stretching           |          |     |       |     |
| 1737      | C=O                             | Stretching           |          |     |       |     |
| 1657      | C=C                             | Stretching           |          |     |       |     |
| 1442      | CH <sub>2</sub>                 | Scissoring           |          |     |       |     |
| 1300      | CH <sub>2</sub>                 | Twisting             |          |     |       |     |
| 1267      | =C-H                            | In plane deformation |          |     |       |     |
| 1090      | C-C                             | Stretching           |          |     |       |     |
| 719       | (CH <sub>3</sub> ) <sub>3</sub> | Symmetric            |          |     |       |     |
| 876       | (CH <sub>3</sub> ) <sub>3</sub> | Asymmetric           |          |     |       |     |
| 1096      | P-O                             | Stretching           |          |     |       |     |
| 723       | (CH <sub>3</sub> ) <sub>3</sub> | Symmetric            |          |     |       |     |
| 882       | (CH <sub>3</sub> ) <sub>3</sub> | Asymmetric           |          |     |       |     |
| 1655-1650 | Amide I                         | -                    |          |     |       |     |
| 1340      | CH                              | Bending              |          |     |       |     |
| 940-934   | C-C                             | Stretching           | - / Meat | 785 | Raman | 110 |
| 550-510   | S-S                             | Stretching           |          |     |       |     |
| 1668-1663 | Amide I                         | -                    |          |     |       |     |
| 1230-1237 | Amide III                       | -                    |          |     |       |     |

**Table 9S. Raman spectra of food adulterant**

| <b>Band position cm<sup>-1</sup></b> | <b>Assignment of Bonds (Molecule/Group)</b> | <b>Mode of Vibration</b>  | <b>Strength of bonds</b> | <b>Sample / Food Matrix</b> | <b>Wavenumber of laser source (nm)</b> | <b>Type of Raman</b> | <b>References</b> |
|--------------------------------------|---------------------------------------------|---------------------------|--------------------------|-----------------------------|----------------------------------------|----------------------|-------------------|
| 1441                                 | -CH <sub>2</sub>                            | C-H bend (shear)          | Strong                   | - / Oil                     | 785                                    | Portable RamTracer   | 111               |
| 1082                                 | -(CH <sub>2</sub> ) <sub>n</sub> -          | C-C stretch               | Medium                   |                             |                                        |                      |                   |
| 1302                                 | -CH <sub>2</sub>                            | C-H bend (twist)          | Medium                   |                             |                                        |                      |                   |
| 1265                                 | cis-RHC=CHR                                 | =C-H stretch              | Medium                   |                             |                                        |                      |                   |
| 1657                                 | cis-RHC=CHR                                 | C=C stretch               | Medium                   |                             |                                        |                      |                   |
| 1747                                 | RC=OOR                                      | C=O stretch               | Weak                     |                             |                                        |                      |                   |
| 1082                                 | -(CH <sub>2</sub> ) <sub>n</sub> -          | C-C stretch               | Medium                   | - / Oil                     | 785                                    | Portable             | 112               |
| 1265                                 | Cis- RHC=CHR                                | =C-H stretch              | Medium                   |                             |                                        |                      |                   |
| 1300                                 | -CH <sub>2</sub>                            | C-H bend (twist)          | Medium                   |                             |                                        |                      |                   |
| 1441                                 | -CH <sub>2</sub>                            | C-H bend (shear)          | Strong                   |                             |                                        |                      |                   |
| 1742 (1747)                          | RC=OOR                                      | C=O stretch               | Weak                     |                             |                                        |                      |                   |
| 1654 (1657)                          | Cis- RHC=CHR                                | C=C stretch               | Medium                   |                             |                                        |                      |                   |
| 3005                                 | cis RHC=CHR                                 | C-H symmetric stretching  | Middle                   | Carotenoid / Oil            | 514.5                                  | VIS Raman            | 113               |
| 2924                                 | -CH <sub>2</sub>                            | C-H asymmetric stretching | Strong                   |                             |                                        |                      |                   |
| 2897                                 | -CH <sub>3</sub>                            | C-H symmetric stretching  | Strong                   |                             |                                        |                      |                   |
| 2850                                 | -CH <sub>2</sub>                            | C-H symmetric stretching  | Strong                   |                             |                                        |                      |                   |
| 1750                                 | RC=OOR                                      | C-O stretching            | Weak                     |                             |                                        |                      |                   |
| 1650                                 | cis RHC-CHR                                 | C-C stretching            | Medium                   |                             |                                        |                      |                   |
| 1525                                 | RHC=CHR                                     | C=C stretching            | Strong                   |                             |                                        |                      |                   |
| 1440                                 | -CH <sub>2</sub>                            | C-H bending               | Medium                   |                             |                                        |                      |                   |
| 1300                                 | -CH <sub>2</sub>                            | (scissor.)                |                          |                             |                                        |                      |                   |
| 1265                                 | cis RHC=CHR                                 | C-H bending               | Weak                     |                             |                                        |                      |                   |
| 1150                                 | -(CH <sub>2</sub> ) <sub>n</sub> -          | (twisting)                | Strong                   |                             |                                        |                      |                   |

|      |                                    |                                                                            |        |                                |      |                       |     |
|------|------------------------------------|----------------------------------------------------------------------------|--------|--------------------------------|------|-----------------------|-----|
| 1008 | HC-CH <sub>3</sub>                 | =C-H bending                                                               | Weak   |                                |      |                       |     |
| 968  | trans RHC-CHR                      | (scissor.)                                                                 | Weak   |                                |      |                       |     |
| 868  | -(CH <sub>2</sub> ) <sub>n</sub> - | C-C stretching<br>CH <sub>3</sub> bending<br>C-C bending<br>C-C stretching | Weak   |                                |      |                       |     |
| 1075 | -(CH <sub>2</sub> ) <sub>n</sub> - | C-C stretching                                                             | Weak   |                                |      |                       |     |
| 1263 | cis-RHC=CHR                        | =C-H bending                                                               | Medium |                                |      |                       |     |
| 1298 | -CH <sub>2</sub>                   | Bending (twisting)                                                         | Medium |                                |      |                       |     |
| 1440 | -CH <sub>2</sub>                   | C-H bending<br>(scissor.)                                                  | Strong |                                |      |                       |     |
| 1652 | cis-RHC=CHR                        | C=C stretching                                                             | Strong | - / Olive and Hazelnut<br>Oils | 780  | Raman                 | 114 |
| 1741 | RC=OOR                             | C=O stretching<br>C-H stretching<br>(sym)                                  | Weak   |                                |      |                       |     |
| 2851 | CH <sub>2</sub>                    |                                                                            |        |                                |      |                       |     |
| 673  | -                                  | In-plane<br>deformation                                                    | Strong |                                |      |                       |     |
| 982  | -                                  | Triazine ring<br>breathing                                                 | Weak   | Melamine / Milk Powder         | 785  | Conventional<br>Raman | 115 |
| 676  | C-N-C                              | Bending<br>Stretching (sym)                                                | Strong |                                |      |                       |     |
| 985  | C-N-C                              | Stretching (sym)                                                           | Medium | Melamine / Dried Milk          | 785  | Conventional<br>Raman | 116 |
| 3126 | N-H                                | Stretching                                                                 | Weak   |                                |      |                       |     |
| 3383 | O-H                                | Stretching                                                                 | Strong |                                |      |                       |     |
| 2924 | C-H                                | Stretching                                                                 | Strong |                                |      |                       |     |
| 1460 | CH <sub>2</sub>                    | Bending                                                                    | Strong |                                |      |                       |     |
| 1372 | CH and OH                          | Bending                                                                    | Strong |                                |      |                       |     |
| 1070 | C(1)H , COH                        | Bending                                                                    | Medium | - / Maple syrup                | 1064 | FT-Raman              | 117 |
| 923  | C(1)H , COH                        | Bending                                                                    | Weak   |                                |      |                       |     |
| 842  | C(1)H                              | Bending                                                                    | Medium |                                |      |                       |     |
| 740  | C-C, CO stretching                 | Stretching                                                                 | Weak   |                                |      |                       |     |
| 3005 | cis RHC=CHR                        | =C-H stretching                                                            | Medium |                                |      |                       |     |

|          |                                                               |                                  |           |                      |      |          |     |
|----------|---------------------------------------------------------------|----------------------------------|-----------|----------------------|------|----------|-----|
|          |                                                               | (sym)<br>C-H stretching          |           |                      |      |          |     |
| 2924     | -CH <sub>2</sub>                                              | (asym)<br>C-H stretching         | Shoulder  |                      |      |          |     |
| 2897     | -CH <sub>3</sub>                                              | (sym)<br>C-H stretching          | Strong    |                      |      |          |     |
| 2850     | -CH <sub>2</sub>                                              | (sym)<br>- C-H stretching        | Strong    |                      |      |          |     |
| 2723     | -(CH <sub>2</sub> ) <sub>n</sub>                              | C=O stretching<br>C=C stretching | Weak      | - / Olive oil        | 1064 | FT-Raman | 118 |
| 1747     | RC=OOR                                                        |                                  | Weak      |                      |      |          |     |
| 1651     | cis RHC=CHR                                                   | C-H bending                      | Medium    |                      |      |          |     |
| 1439     | -CH <sub>2</sub>                                              | (scissoring)<br>C-H bending      | Strong    |                      |      |          |     |
| 1300     | -CH <sub>2</sub>                                              | (twisting)<br>=C-H bending       | Medium    |                      |      |          |     |
| 1265     | cis RHC=CHR                                                   | C-C stretching                   | Shoulder  |                      |      |          |     |
| 1076     | -(CH <sub>2</sub> ) <sub>n</sub> -                            | C=C bending                      | very weak |                      |      |          |     |
| 968      | trans RHC=CHR                                                 | C-C stretching                   | Weak      |                      |      |          |     |
| 868      | -(CH <sub>2</sub> ) <sub>n</sub> -                            |                                  | Weak      |                      |      |          |     |
| 879      | vC <sub>1</sub> -C <sub>2</sub> ,<br>CH <sub>3</sub> rocking, | Stretching                       | -         |                      |      |          |     |
|          | vC-O                                                          | Stretching                       | -         |                      |      |          |     |
| 1085 and | vC-C aliphatic                                                | Stretching                       | -         |                      |      |          |     |
| 1304     | C-C stretch                                                   | Stretching                       | -         | - / butter           | 785  | Raman    | 119 |
| 1125     | v C-C                                                         | Stretching                       | -         |                      |      |          |     |
| 1271     | δ=CH                                                          | Deformation                      | -         |                      |      |          |     |
| 1442     | δCH <sub>2</sub>                                              | Deformation                      | -         |                      |      |          |     |
| 838      | C-C                                                           | Stretching                       | -         | Hazelnut / Olive and | 532  | Raman    | 120 |

|           |                 |                     |   |                       |     |                         |     |
|-----------|-----------------|---------------------|---|-----------------------|-----|-------------------------|-----|
| 950       | C=C             | Bending             | - | adulterated olive oil |     |                         |     |
| 1072      | CH <sub>3</sub> | Bend                | - |                       |     |                         |     |
| 1264      | =C-H            | Scissoring          | - |                       |     |                         |     |
| 1301      | C-H             | Scissoring          | - |                       |     |                         |     |
| 1443      | C-H             | Twisting            | - |                       |     |                         |     |
| 1656      | C=C             | Stretching          | - |                       |     |                         |     |
| 1745      | C=O             | Stretching          | - |                       |     |                         |     |
| 3312-3334 | O-H             | Stretching          | - |                       |     |                         |     |
| 2945      | C-H             | Stretching          | - |                       |     |                         |     |
| 2938-2944 | CH <sub>2</sub> | Asymmetric          | - |                       |     |                         |     |
|           |                 | Stretching          | - |                       |     |                         |     |
|           |                 | Stretching          | - |                       |     |                         |     |
| 2900-2907 | C-H             | Bending             | - |                       |     |                         |     |
| 1636-1642 | O-H             | Bending             | - |                       |     |                         |     |
| 1458-1461 | CH <sub>2</sub> | Bending             | - |                       |     |                         |     |
| 1372-1374 | O-H, C-H        | Bending             | - |                       |     |                         |     |
| 1364-1369 | CH <sub>2</sub> | Wagging             | - |                       |     |                         |     |
| 1349      | CH <sub>2</sub> | Stretching          | - |                       |     |                         |     |
| 1265-1267 | COH,Amide III   | Stretching          | - |                       |     |                         |     |
| 1126-1127 | CN,Proteins     | Stretching          | - |                       |     |                         |     |
| 1077      | C-O             | Bending             | - |                       |     |                         |     |
| 1070-1077 | CH,COH,CN       |                     | - | - / Honey             | 532 | FT-Raman Micro<br>Raman | 121 |
|           | Protein         | Stretching          | - |                       |     |                         |     |
| 1069-1064 | C-O             | Bending             | - |                       |     |                         |     |
| 922-916   | C-H,COH         | Bending             | - |                       |     |                         |     |
| 904       | C-H             | Stretching          | - |                       |     |                         |     |
| 821       | C-H             | Bending             | - |                       |     |                         |     |
| 777       | C-H             | Stretching          | - |                       |     |                         |     |
| 707-706   | CO,CCO,OCO      | Ring Bending        | - |                       |     |                         |     |
| 629-630   | -               | Skeletal Stretching | - |                       |     |                         |     |
| 590-592   | -               | Bending             | - |                       |     |                         |     |
| 519-522   | CCO,CCC         | Skeletal Stretching | - |                       |     |                         |     |
| 449-450   | -               | Bending             | - |                       |     |                         |     |
| 420-424   | CCO,CCC         |                     | - |                       |     |                         |     |
| 680       | Melamine        | -                   | - | Melamine / Milk       | -   | -                       | 122 |



|           |                   |                                       |   |                       |      |          |     |
|-----------|-------------------|---------------------------------------|---|-----------------------|------|----------|-----|
| 695       | Melamine          | -                                     | - |                       |      |          |     |
| 682       | Melamine          | Ring Breathing                        | - |                       |      |          |     |
|           |                   | Mode II and plane deformation of ring |   |                       |      |          |     |
| 850       | Amylose           | -                                     | - |                       |      |          |     |
| 1253      | Amylose           | -                                     | - |                       |      |          |     |
| 905       | Amylopectin       | -                                     | - |                       |      |          |     |
| 1391      | Amylopectin       | -                                     | - |                       |      |          |     |
| 1342      | CH <sub>2</sub>   | Twisting                              | - | Paraffin / Rice       | 514  | Raman    | 123 |
| 1314      | CH <sub>2</sub>   | Wagging                               | - |                       |      |          |     |
| 1452      | CH <sub>2</sub>   | Deformation                           | - |                       |      |          |     |
| 1360      | -                 | Vibration                             | - |                       |      |          |     |
| 1032      | -                 | Vibration                             | - |                       |      |          |     |
| 1004      | -                 | Ring breathing                        | - |                       |      |          |     |
| 705       | -                 | -                                     | - |                       |      |          |     |
| 1085      | Milk powder       | -                                     | - | Calcium / Milk Powder | 1064 | FT-Raman | 124 |
| 1300      | -                 | -                                     | - |                       |      |          |     |
| 1440      | -                 | -                                     | - |                       |      |          |     |
| 212       | Dicyandiamide     | -                                     | - |                       |      |          |     |
| 673       | Melamine          | -                                     | - |                       |      |          |     |
| 973       | Ammonium Sulphate | -                                     | - | - / Dry milk          | 785  | Raman    | 125 |
| 1009      | Urea              | -                                     | - |                       |      |          |     |
| 1270      | =C-H              | Bending                               | - |                       |      |          |     |
| 1660      | C=C               | Stretching                            | - |                       |      |          |     |
| 1060-1130 | C-C               | Stretching                            | - | Adipose Tissue / Meat | 785  | Raman    | 126 |
| 1209-1305 | CH <sub>2</sub>   | Twisting                              | - |                       |      |          |     |
| 1655      | -                 | Olefinic Bond                         | - |                       |      |          |     |
| 1400-1500 | CH <sub>2</sub>   | Scissoring                            | - |                       |      |          |     |
| 1450      | CH                | Bending                               | - |                       |      |          |     |
| 1660      | -                 | Amide I                               | - |                       |      |          |     |
| 939       | C-C               | Stretching                            | - |                       |      |          |     |
| 1310      | -                 | Amide III                             | - |                       |      |          |     |
| 1450      | CH                | Bending                               | - |                       |      |          |     |

|           |                              |                     |   |      |          |       |     |
|-----------|------------------------------|---------------------|---|------|----------|-------|-----|
| 1650      | -                            | Amide I             | - | Meat | 671, 783 | Raman | 127 |
| 1650      | -                            | Amide I             | - |      |          |       |     |
| 937       | C-C                          | Stretching          | - |      |          |       |     |
| 1310      | -                            | Amide III           | - |      |          |       |     |
| 1655      | -                            | Amide I             | - |      |          |       |     |
| 1340      | C-H                          | Bending             | - |      |          |       |     |
| 899       | C-C                          | Stretching          | - |      |          |       |     |
| 932       | C-C                          | Stretching          | - |      |          |       |     |
| 1650      | -                            | Amide I             | - |      |          |       |     |
| 800-920   | $\nu(\text{C}_1\text{-C}_2)$ | Stretching          | - |      |          |       |     |
|           | $\nu(\text{C}_1\text{-C}_2)$ | Rocking             | - |      |          |       |     |
| 1070-1100 | $\nu(\text{C-C})$            | Stretching          | - | Meat | 785      | Raman | 128 |
| 1295-1305 | $\delta(\text{CH}_2)$        | Twisting            | - |      |          |       |     |
| 1400-1500 | $\delta(\text{CH}_2)$        | Scissor deformation | - |      |          |       |     |

- Z. Chi, X. G. Chen, J. S. W. Holtz and S. A. Asher, *Biochemistry*, 1998, 37, 2854-2864.
- G. T. Meng, J. C. K. Chan, D. Rousseau and E. C. Y. Li-Chan, *J Agr Food Chem*, 2005, 53, 845-852.
- S. Ngarize, A. Adams and N. K. Howell, *Food Hydrocolloid*, 2004, 18, 49-59.
- E. G. Ferrer, A. V. Gomez, M. C. Anon and M. C. Puppo, *Spectrochim Acta A*, 2011, 79, 278-281.
- M. Nonaka, E. Lichan and S. Nakai, *J Agr Food Chem*, 1993, 41, 1176-1181.
- H. W. Wong, S. M. Choi, D. L. Phillips and C. Y. Ma, *Food Chem*, 2009, 113, 363-370.
- C. Y. Huang, G. Balakrishnan and T. G. Spiro, *J Raman Spectrosc*, 2006, 37, 277-282.
- I. Sanchez-Gonzalez, P. Carmona, P. Moreno, J. Borderias, I. Sanchez-Alonso, A. Rodriguez-Casado and M. Careche, *Food Chem*, 2008, 106, 56-64.
- A. Zajac, J. Hanuza and L. Dyminska, *Food Chemistry*, 2014, 156, 333-338.
- I. H. Boyaci, H. T. Temiz, R. S. Uysal, H. M. Velioglu, R. J. Yadegari and M. M. Rishkan, *Food Chemistry*, 2014, 148, 37-41.
- J. H. Shao, Y. F. Zou, X. L. Xu, J. Q. Wu and G. H. Zhou, *Food Res Int*, 2011, 44, 2955-2961.
- H. M. Velioglu, H. T. Temiz and I. H. Boyaci, *Food Chemistry*, 2015, 172, 283-290.
- S. M. Fowler, H. Schmidt, R. van de Ven, P. Wynn and D. L. Hopkins, *Meat Sci*, 2014, 97, 597-601.
- D. T. Berhe, S. B. Engelsen, M. S. Hviid and R. Lametsch, *Food Res Int*, 2014, 66, 123-131.
- A. S. Sivam, D. Sun-Waterhouse, C. O. Perera and G. I. N. Waterhouse, *Food Res Int*, 2013, 50, 574-585.
- A. V. Gomez, E. G. Ferrer, M. C. Anon and M. C. Puppo, *J Mol Struct*, 2013, 1033, 51-58.
- N. Perisic, N. K. Afseth, R. Ofstad, S. Hassani and A. Kohler, *Food Chemistry*, 2013, 138, 679-686.

18. Z. L. Lim, N. H. Low, B. A. Moffatt and G. R. Gray, *Cryobiology*, 2013, 66, 156-166.
19. J. Huen, C. Weikusat, M. Bayer-Giraldi, I. Weikusat, L. Ringer and K. Lösche, *Journal of Cereal Science*, 2014, 60, 555-560.
20. B. Volkert, A. Lehmann, T. Greco and M. H. Nejad, *Carbohydr Polym*, 2010, 79, 571-577.
21. C. Mutungji, L. Passauer, C. Onyango, D. Jaros and H. Rohm, *Carbohydr Polym*, 2012, 87, 598-606.
22. C. K. Chong, J. Xing, D. L. Phillips and H. Corke, *J Agr Food Chem*, 2001, 49, 2702-2708.
23. I. Delfino, C. Camerlingo, M. Portaccio, B. Della Ventura, L. Mita, D. G. Mita and M. Lepore, *Food Chem*, 2011, 127, 735-742.
24. L. Passauer, H. Bender and S. Fischer, *Carbohydr Polym*, 2010, 82, 809-814.
25. E. Pigorsch, *Starch-Starke*, 2009, 61, 129-138.
26. A. Flores-Morales, M. Jimenez-Estrada and R. Mora-Escobedo, *Carbohydr Polym*, 2012, 87, 61-68.
27. S. N. Yuen, S. M. Choi, D. L. Phillips and C. Y. Ma, *Food Chem*, 2009, 114, 1091-1098.
28. K. Ilaslan, I. H. Boyaci and A. Topcu, *Food Control*, 2015, 48, 56-61.
29. A. S. Jaaskelainen, U. Holopainen-Mantila, T. Tamminen and T. Vuorinen, *Journal of Cereal Science*, 2013, 57, 543-550.
30. H. Akinoshio, S. Hawkins and L. Wicker, *Carbohydr Polym*, 2013, 98, 276-281.
31. M. Labanowska, A. Weselucha-Birczynska, M. Kurdziel and P. Puch, *Carbohydr Polym*, 2013, 92, 842-848.
32. M. C. Sarraguça, T. De Beer, C. Vervaet, J.-P. Remon and J. A. Lopes, *Talanta*, 2010, 83, 130-138.
33. O. Abbas, J. A. F. Pierna, R. Codony, C. von Holst and V. Baeten, *J Mol Struct*, 2009, 924-26, 294-300.
34. G. L. Johnson, R. M. Machado, K. G. Freidl, M. L. Achenbach, P. J. Clark and S. K. Reidy, *Org Process Res Dev*, 2002, 6, 637-644.
35. I. Sanchez-Alonso, P. Carmona and M. Careche, *Food Chem*, 2012, 132, 160-167.
36. V. Baeten, P. Hourant, M. T. Morales and R. Aparicio, *J Agr Food Chem*, 1998, 46, 2638-2646.
37. B. J. Marquardt and J. P. Wold, *Lebensm-Wiss Technol*, 2004, 37, 1-8.
38. C. M. McGoverin, A. S. S. Clark, S. E. Holroyd and K. C. Gordon, *Anal Chim Acta*, 2010, 673, 26-32.
39. R. Rodríguez-Solana, D. J. Daferera, C. Mitsi, P. Trigas, M. Polissiou and P. A. Tarantilis, *Industrial Crops and Products*, 2014, 62, 22-33.
40. Y. Fan, J. Zhou and D. P. Xu, *Spectrochim Acta A*, 2014, 129, 143-147.
41. R. M. El-Abassy, P. Donfack and A. Materny, *Food Res Int*, 2010, 43, 694-700.
42. C. Cimpoiu, D. Casoni, A. Hosu, V. Miclaus, T. Hodisan and G. Damian, *J Liq Chromatogr R T*, 2005, 28, 2551-2559.
43. C. W. Tsai and M. D. Morris, *Anal Chim Acta*, 1975, 76, 193-198.
44. J. R. Beattie, C. Maguire, S. Gilchrist, L. J. Barrett, C. E. Cross, F. Possmayer, M. Ennis, J. S. Elborn, W. J. Curry, J. J. McGarvey and B. C. Schock, *Faseb J*, 2007, 21, 766-776.
45. L. Rimai, D. Gill and J. L. Parsons, *J Am Chem Soc*, 1971, 93, 1353-&.
46. C. Y. Panicker, H. T. Varghese and D. Philip, *Spectrochim Acta A*, 2006, 65, 802-804.
47. H. Yang and J. Irudayaraj, *J Pharm Pharmacol*, 2002, 54, 1247-1255.
48. M. Kim and P. R. Carey, *J Am Chem Soc*, 1993, 115, 7015-7016.
49. M. Harz, P. Rosch, K. D. Peschke, O. Ronneberger, H. Burkhardt and J. Popp, *Analyst*, 2005, 130, 1543-1550.
50. H. Yang and J. Irudayaraj, *J Mol Struct*, 2003, 646, 35-43.
51. P. Rosch, M. Schmitt, W. Kiefer and J. Popp, *J Mol Struct*, 2003, 661, 363-369.
52. K. Maquelin, C. Kirschner, L. P. Choo-Smith, N. van den Braak, H. P. Endtz, D. Naumann and G. J. Puppels, *J Microbiol Meth*, 2002, 51, 255-271.

53. E. C. Lopez-Diez and R. Goodacre, *Anal Chem*, 2004, 76, 585-591.
54. K. C. Schuster, I. Reese, E. Urlaub, J. R. Gapes and B. Lendl, *Anal Chem*, 2000, 72, 5529-5534.
55. K. C. Schuster, E. Urlaub and J. R. Gapes, *J Microbiol Meth*, 2000, 42, 29-38.
56. Z. Q. Wen, S. A. Overman and G. J. Thomas, *Biochemistry-U.S.*, 1997, 36, 7810-7820.
57. A. Silge, W. Schumacher, P. Rosch, P. A. Da Costa, C. Gerard and J. Popp, *Syst Appl Microbiol*, 2014, 37, 360-367.
58. D. Kusic, B. Kampe, P. Rosch and J. Popp, *Water Res*, 2014, 48, 179-189.
59. U. Munchberg, L. Wagner, E. T. Spielberg, K. Voigt, P. Rosch and J. Popp, *Bba-Mol Cell Biol L*, 2013, 1831, 341-349.
60. P. Rosch, M. Harz, M. Schmitt, K. D. Peschke, O. Ronneberger, H. Burkhardt, H. W. Motzkus, M. Lankers, S. Hofer, H. Thiele and J. Popp, *Appl Environ Microb*, 2005, 71, 1626-1637.
61. U. Munchberg, P. Rosch, M. Bauer and J. Popp, *Anal Bioanal Chem*, 2014, 406, 3041-3050.
62. N. N. Brandt, A. Y. Chikishev, A. I. Sotnikov, Y. A. Savochkina, I. I. Agapov and A. G. Tonevitsky, *J Mol Struct*, 2005, 735-736, 293-298.
63. P. X. Zhang, Z. Xiaofang, Y. S. C. Andrew and F. Yan, *Journal of Physics: Conference Series*, 2006, 28, 7.
64. G. Gupta, A. S. B. Bhaskar, B. K. Tripathi, P. Pandey, M. Boopathi, P. V. L. Rao, B. Singh and R. Vijayaraghavan, *Biosensors and Bioelectronics*, 2011, 26, 2534-2540.
65. T. G. Levitskaia, S. I. Sinkov and S. A. Bryan, *Vibrational Spectroscopy*, 2007, 44, 316-323.
66. N. Sundaraganesan, N. Puviarasan and S. Mohan, *Talanta*, 2001, 54, 233-241.
67. V. Sortur, J. Yenagi, J. Tonannavar, V. B. Jadhav and M. V. Kulkarni, *Spectrochimica Acta Part A: Molecular and Biomolecular Spectroscopy*, 2006, 64, 301-307.
68. S. A. Asher, *Anal Chem*, 1984, 56, 720-724.
69. A. I. Alajtal, H. G. M. Edwards and I. J. Scowen, *J Raman Spectrosc*, 2011, 42, 179-185.
70. K. M. Lee, T. J. Herrman and U. Yun, *Journal of Cereal Science*, 2014, 59, 70-78.
71. G. D. Fleming, J. Villagrán and R. Koch, *Spectrochimica Acta Part A: Molecular and Biomolecular Spectroscopy*, 2013, 114, 120-128.
72. S. Bonora, E. Benassi, A. Maris, V. Tugnoli, S. Ottani and M. Di Foggia, *J Mol Struct*, 2013, 1040, 139-148.
73. K.-M. Lee, J. Davis, T. J. Herrman, S. C. Murray and Y. Deng, *Food Chemistry*, 2015, 173, 629-639.
74. I. V. Ermakov, M. R. Ermakova and W. Gellermann, *P Soc Photo-Opt Ins*, 2006, 6078, 7835-7835.
75. M. Snehalatha, C. Ravikumar, N. Sekar, V. S. Jayakumar and I. H. Joe, *J Raman Spectrosc*, 2008, 39, 928-936.
76. N. Peica, I. Pavel, S. C. Pinzaru, V. K. Rastogi and W. Kiefer, *J Raman Spectrosc*, 2005, 36, 657-666.
77. K. Zborowski, R. Grybos and L. M. Proniewicz, *Vibrational Spectroscopy*, 2005, 37, 233-236.
78. N. Peica, C. Lehene, N. Leopold, S. Schlucker and W. Kiefer, *Spectrochim Acta A*, 2007, 66, 604-615.
79. N. Peica, *J Raman Spectrosc*, 2009, 40, 2144-2154.
80. E. Podstawka, M. Swiatlowska, E. Borowiec and L. M. Proniewicz, *J Raman Spectrosc*, 2007, 38, 356-363.
81. D. Wu, J. Yan, J. Wang, Q. Wang and H. Li, *Food Chemistry*, 2015, 170, 423-429.
82. A. Zając, J. Hanuza, M. Wandas and L. Dymińska, *Spectrochimica Acta Part A: Molecular and Biomolecular Spectroscopy*, 2015, 134, 114-120.
83. C. S. Mangolim, C. Moriwaki, A. C. Nogueira, F. Sato, M. L. Baesso, A. M. Neto and G. Matioli, *Food Chemistry*, 2014, 153, 361-370.
84. A. G. Gonzalez, D. Martin, K. Slowing and A. Gonzalez Ureña, *Food Structure*, DOI: <http://dx.doi.org/10.1016/j.foostr.2014.09.001>.
85. Y. Xie, P. Li, J. Zhang, H. Wang, H. Qian and W. Yao, *Spectrochimica Acta Part A: Molecular and Biomolecular Spectroscopy*, 2013, 114, 80-84.
86. K. Zhang, J. Helm, D. Peschel, M. Gruner, T. Groth and S. Fischer, *Polymer*, 2010, 51, 4698-4705.
87. M. Holse, F. H. Larsen, A. Hansen and S. B. Engelsen, *Food Res Int*, 2011, 44, 373-384.

88. R. Korifi, Y. Le Dreau, J. Molinet, J. Artaud and N. Dupuy, *J Raman Spectrosc*, 2011, 42, 1540-1547.
89. M. M. Paradkar and J. Irudayaraj, *Food Chem*, 2002, 76, 231-239.
90. H. Yang, J. Irudayaraj and M. M. Paradkar, *Food Chem*, 2005, 93, 25-32.
91. R. M. El-Abassy, P. Donfack and A. Materny, *Food Chem*, 2011, 126, 1443-1448.
92. A. B. Rubayiza and M. Meurens, *J Agr Food Chem*, 2005, 53, 4654-4659.
93. I. H. Boyaci, H. E. Genis, B. Guven, U. Tamer and N. Alper, *J Raman Spectrosc*, 2012, 43, 1171-1176.
94. B. Özbalci, I. H. Boyaci, A. Topcu, C. Kadilar and U. Tamer, *Food Chem*, 2013, 136, 1444-1452.
95. R. S. Uysal, E. A. Soykut, I. H. Boyaci and A. Topcu, *Food Chemistry*, 2013, 141, 4333-4343.
96. M. R. Almeida, C. H. V. Fidelis, L. E. S. Barata and R. J. Poppi, *Talanta*, 2013, 117, 305-311.
97. H. M. Monavar, N. K. Afseth, J. Lozano, R. Alimardani, M. Omid and J. P. Wold, *Talanta*, 2013, 111, 98-104.
98. A. Keidel, D. von Stetten, C. Rodrigues, C. Máguas and P. Hildebrandt, *Journal of Agricultural and Food Chemistry*, 2010, 58, 11187-11192.
99. J. Trebolazabala, M. Maguregui, H. Morillas, A. de Diego and J. M. Madariaga, *Spectrochim Acta A*, 2013, 105, 391-399.
100. H. Lee, B. K. Cho, M. S. Kim, W. H. Lee, J. Tewari, H. Bae, S. I. Sohn and H. Y. Chi, *Sensor Actuat B-Chem*, 2013, 185, 694-700.
101. A. A. Argyri, R. M. Jarvis, D. Wedge, Y. Xu, E. Z. Panagou, R. Goodacre and G. J. E. Nychas, *Food Control*, 2013, 29, 461-470.
102. R. Rodriguez, S. Vargas, M. Estevez, F. Quintanilla, A. Trejo-Lopez and A. R. Hernandez-Martinez, *Vib Spectrosc*, 2013, 68, 133-140.
103. Y. Numata, Y. Shinohara, T. Kitayama and H. Tanaka, *Process Biochem*, 2013, 48, 569-574.
104. P. J. Li, B. H. Kong, Q. Chen, D. M. Zheng and N. Liu, *Meat Sci*, 2013, 93, 67-72.
105. E. Guzmán, V. Baeten, J. A. Fernández Pierna and J. A. García-Mesa, *Food Control*, 2011, 22, 2036-2040.
106. J. Qin, K. Chao and M. S. Kim, *Journal of Food Engineering*, 2011, 107, 277-288.
107. X.-L. Xu, M.-Y. Han, Y. Fei and G.-H. Zhou, *Meat Sci*, 2011, 87, 159-164.
108. I. Gouvinhas, N. Machado, T. Carvalho, J. M. M. de Almeida and A. I. R. N. A. Barros, *Talanta*, 2015, 132, 829-835.
109. K. Czamara, K. Majzner, M. Z. Pacia, K. Kochan, A. Kaczor and M. Baranska, *Journal of Raman Spectroscopy*, 2014, DOI: 10.1002/jrs.4607, n/a-n/a.
110. D. T. Berhe, A. J. Lawaetz, S. B. Engelsen, M. S. Hviid and R. Lametsch, *Food Control*, 2015, 52, 119-125.
111. M. Q. Zou, X. F. Zhang, X. H. Qi, H. L. Ma, Y. Dong, C. W. Liu, X. Guo and H. Wang, *J Agr Food Chem*, 2009, 57, 6001-6006.
112. X. F. Zhang, X. H. Qi, M. Q. Zou and F. Liu, *Anal Lett*, 2011, 44, 2209-2220.
113. R. M. El-Abassy, P. Donfack and A. Materny, *J Raman Spectrosc*, 2009, 40, 1284-1289.
114. E. C. Lopez-Diez, G. Bianchi and R. Goodacre, *J Agr Food Chem*, 2003, 51, 6145-6150.
115. Y. Cheng, Y. Y. Dong, J. H. Wu, X. R. Yang, H. Bai, H. Y. Zheng, D. M. Ren, Y. D. Zou and M. Li, *J Food Compos Anal*, 2010, 23, 199-202.
116. S. Okazaki, M. Hiramatsu, K. Gonmori, O. Suzuki and A. T. Tu, *Forensic Toxicol*, 2009, 27, 94-97.
117. M. M. Paradkar, S. Sakhamuri and J. Irudayaraj, *J Food Sci*, 2002, 67, 2009-2015.
118. H. Yang and J. Irudayaraj, *J Am Oil Chem Soc*, 2001, 78, 889-895.
119. R. S. Uysal, I. H. Boyaci, H. E. Genis and U. Tamer, *Food Chemistry*, 2013, 141, 4397-4403.
120. D. I. Ellis, V. L. Brewster, W. B. Dunn, J. W. Allwood, A. P. Golovanov and R. Goodacre, *Chem Soc Rev*, 2012, 41, 5706-5727.
121. F. Corvucci, L. Nobili, D. Melucci and F.-V. Grillenzoni, *Food Chemistry*, 2015, 169, 297-304.
122. E. Domingo, A. A. Tirelli, C. A. Nunes, M. C. Guerreiro and S. M. Pinto, *Food Res Int*, 2014, 60, 131-139.
123. X. W. Feng, Q. H. Zhang, P. S. Cong and Z. L. Zhu, *Talanta*, 2013, 115, 548-555.

124. G. P. S. Smith, K. C. Gordon and S. E. Holroyd, *Vib Spectrosc*, 2013, 67, 87-91.
125. J. W. Qin, K. L. Chao and M. S. Kim, *Food Chemistry*, 2013, 138, 998-1007.
126. J. R. Beattie, S. E. J. Bell, C. Borggaard, A. M. Fearon and B. W. Moss, *Lipids*, 2007, 42, 679-685.
127. K. Sowoidnich and H. D. Kronfeldt, *Appl Phys B-Lasers O*, 2012, 108, 975-982.
128. I. H. Boyaci, R. S. Uysal, T. Temiz, E. G. Shendi, R. J. Yadegari, M. M. Rishkan, H. M. Velioglu, U. Tamer, D. S. Ozay and H. Vural, *Eur Food Res Technol*, 2014, 238, 845-852.
